# Subtyping Social Determinants of Health in *All of Us*: Network Analysis and Visualization Approach

Suresh K. Bhavnani, Ph.D., M.Arch.<sup>1,2§</sup> Weibin Zhang, Ph.D.,<sup>1</sup> Daniel Bao, B.S.,<sup>1</sup> Mukaila Raji, M.D., M.S., F.A.C.P.,<sup>3</sup>  
Veronica Ajewole, Pharm.D., BCOP,<sup>4</sup> Rodney Hunter, Pharm.D., BCOP,<sup>4</sup> Yong-Fang Kuo, Ph.D.,<sup>1</sup> Susanne Schmidt, Ph.D.,<sup>5</sup>  
Monique R. Pappadis, Ph.D., MEd, FACRM,<sup>1</sup> Elise Smith, Ph.D.,<sup>1,2</sup> Alex Bokov, Ph.D.,<sup>5</sup> Timothy Reistetter, Ph.D., OTR.,<sup>6</sup>  
Shyam Visweswaran\*, M.D., Ph.D.,<sup>7,8</sup> Brian Downer\*, Ph.D.<sup>1</sup>

<sup>1</sup>School of Public and Population Health, University of Texas Medical Branch, Galveston, TX, USA

<sup>2</sup>Institute for Translational Sciences, University of Texas Medical Branch, Galveston, TX, USA

<sup>3</sup>Division of Geriatric Medicine, Department of Internal Medicine, University of Texas Medical Branch, Galveston, TX, USA

<sup>4</sup>College of Pharmacy and Health Sciences, Texas Southern University, TX, USA

<sup>5</sup>Department of Population Health Sciences, Long School of Medicine, University of Texas Health San Antonio, San Antonio, TX, USA

<sup>6</sup>School of Health Professions, University of Texas Health San Antonio, San Antonio, TX, USA

<sup>7</sup>Department of Biomedical Informatics, University of Pittsburgh, Pittsburgh, PA, USA

<sup>8</sup>Intelligent Systems Program, University of Pittsburgh, Pittsburgh, PA, USA

## §Corresponding author

Suresh K. Bhavnani, Ph.D., M.Arch., FAMIA  
Department of Biostatistics and Data Science  
School of Public and Population Health  
Institute for Translational Sciences  
University of Texas Medical Branch  
301 University Blvd  
Galveston, TX, USA  
email: [subhavna@utmb.edu](mailto:subhavna@utmb.edu)

\* *Shyam Visweswaran and Brian Downer share senior authorship*

## 31 A. Abstract

32 **Background:** Social determinants of health (SDoH), such as financial resources and housing stability, account  
33 for between 30-55% of people's health outcomes. While many studies have identified strong associations among  
34 specific SDoH and health outcomes, most people experience multiple SDoH that impact their daily lives. Analysis  
35 of this complexity requires the integration of personal, clinical, social, and environmental information from a large  
36 cohort of individuals that have been traditionally underrepresented in research, which is only recently being made  
37 available through the *All of Us* research program. However, little is known about the range and response of  
38 SDoH in *All of Us*, and how they co-occur to form subtypes, which are critical for designing targeted interventions.

39 **Objective:** To address two research questions: (1) What is the range and response to survey questions related  
40 to SDoH in the *All of Us* dataset? (2) How do SDoH co-occur to form subtypes, and what are their risk for adverse  
41 health outcomes?

42 **Methods:** For Question-1, an expert panel analyzed the range of SDoH questions across the surveys with  
43 respect to the 5 domains in *Healthy People 2030 (HP-30)*, and analyzed their responses across the full *All of Us*  
44 data (n=372,397, V6). For Question-2, we used the following steps: (1) due to the missingness across the  
45 surveys, selected all participants with valid and complete SDoH data, and used inverse probability weighting to  
46 adjust their imbalance in demographics compared to the full data; (2) an expert panel grouped the SDoH  
47 questions into SDoH factors for enabling a more consistent granularity; (3) used bipartite modularity  
48 maximization to identify SDoH biclusters, their significance, and their replicability; (4) measured the association  
49 of each bicluster to three outcomes (depression, delayed medical care, emergency room visits in the last year)  
50 using multiple data types (surveys, electronic health records, and zip codes mapped to Medicaid expansion  
51 states); and (5) the expert panel inferred the subtype labels, potential mechanisms that precipitate adverse health  
52 outcomes, and interventions to prevent them.

53 **Results:** For Question-1, we identified 110 SDoH questions across 4 surveys, which covered all 5 domains in  
54 *HP-30*. However, the results also revealed a large degree of missingness in survey responses (1.76%-84.56%),  
55 with later surveys having significantly fewer responses compared to earlier ones, and significant differences in  
56 race, ethnicity, and age of participants of those that completed the surveys with SDoH questions, compared to  
57 those in the full *All of Us* dataset. Furthermore, as the SDoH questions varied in granularity, they were  
58 categorized by an expert panel into 18 SDoH factors. For Question-2, the subtype analysis (n=12,913, d=18)  
59 identified 4 biclusters with significant biclusteredness (Q=0.13, random-Q=0.11, z=7.5, P<0.001), and significant  
60 replication (Real-RI=0.88, Random-RI=0.62, P<.001). Furthermore, there were statistically significant  
61 associations between specific subtypes and the outcomes, and with Medicaid expansion, each with meaningful  
62 interpretations and potential targeted interventions. For example, the subtype *Socioeconomic Barriers* included  
63 the SDoH factors *not employed*, *food insecurity*, *housing insecurity*, *low income*, *low literacy*, and *low educational*  
64 *attainment*, and had a significantly higher odds ratio (OR=4.2, CI=3.5-5.1, P-corr<.001) for depression, when  
65 compared to the subtype *Sociocultural Barriers*. Individuals that match this subtype profile could be screened  
66 early for depression and referred to social services for addressing combinations of SDoH such as *housing*  
67 *insecurity* and *low income*. Finally, the identified subtypes spanned one or more *HP-30* domains revealing the  
68 difference between the current knowledge-based SDoH domains, and the data-driven subtypes.

69 **Conclusions:** The results revealed that the SDoH subtypes not only had statistically significant clustering and  
70 replicability, but also had significant associations with critical adverse health outcomes, which had translational  
71 implications for designing targeted SDoH interventions, decision-support systems to alert clinicians of potential  
72 risks, and for public policies. Furthermore, these SDoH subtypes spanned multiple SDoH domains defined by *HP-*  
73 *30* revealing the complexity of SDoH in the real-world, and aligning with influential SDoH conceptual models such  
74 as by Dahlgren-Whitehead. However, the high-degree of missingness warrants repeating the analysis as the  
75 data becomes more complete. Consequently we designed our machine learning code to be generalizable and  
76 scalable, and made it available on the *All of Us* workbench, which can be used to periodically rerun the analysis  
77 as the dataset grows for analyzing subtypes related to SDoH, and beyond.

## 78 B. Introduction

79 Social determinants of health (SDoH), such as financial resources<sup>1</sup> and housing stability,<sup>2</sup> account for between  
80 30-55% of people's health outcomes.<sup>3</sup> While many studies have identified strong associations among specific  
81 SDoH and health outcomes, most people experience multiple SDoH concurrently in their daily lives.<sup>4-8</sup> For  
82 example, limited access to education, unstable employment, and lack of access to healthcare tend to frequently  
83 co-occur across individuals leading to long-term stress and depression.<sup>8</sup> Such complex interactions among  
84 multiple SDoH make it critical to analyze combinations of SDoH versus single factors. However, analysis of such  
85 co-occurrences and their risks for adverse health outcomes requires the integration of personal, clinical, social,  
86 and environmental information, critical for designing cost-effective and targeted interventions. Unfortunately, the  
87 lack of databases containing such multiple datatypes from the same individuals has resulted in a fragmented  
88 understanding of how SDoH co-occur and impact health, critical for designing targeted interventions.

89 The *All of Us* program<sup>9-11</sup> provides an unprecedented opportunity to address this fragmented view of SDoH. This  
90 program aims to collect data from multiple sources related to one million or more individuals with a focus on  
91 populations that have been traditionally underrepresented in biomedical research. These data sources include  
92 electronic health records (EHRs), health surveys, whole sequence genome data, physical measurements, and  
93 personal digital information. Critically, *All of Us* provides several survey modules containing a wide range of  
94 SDoH, which in combination with other data sources, could transform our understanding of high-risk  
95 combinations of SDoH.<sup>9</sup>

96 However, little is known about the range and response of SDoH in *All of Us*, and how they co-occur to form  
97 subtypes, which are critical for designing targeted medicine interventions. To address these gaps, we  
98 characterized 110 SDoH in *All of Us*, which guided the methods we used to analyze how they co-occur to form  
99 subtypes, and their risk for health outcomes. The results helped to highlight the opportunities and challenges for  
100 conducting subtype analysis in *All of Us*, which integrates multiple datatypes by using scalable and generalizable  
101 machine learning methods targeted to the design of targeted interventions.

## 102 C. Background

### 103 Social Determinants of Health

104 The World Health Organization (WHO) defines SDoH as the “non-  
105 medical factors that influence health outcomes.”<sup>3</sup> Specifically,  
106 these include the conditions in which people are born, grow, work,  
107 live, and age. Furthermore, such conditions are shaped by a wider  
108 set of forces such as economic and social policies, and systems  
109 such as discriminatory laws and structural racism.

110 Several models have proposed the factors and mechanisms  
111 involved in SDoH.<sup>4,12</sup> These models were motivated by the  
112 concept of *social gradient*,<sup>13</sup> an empirical phenomenon observed  
113 within and across nations,<sup>14,15</sup> consistently showing that the lower  
114 an individual's social socioeconomic position, the worse their  
115 health. To help explain the factors underlying the social gradient,  
116 the Dahlgren-Whitehead model<sup>4,16</sup> proposed several inter-  
117 connected layers of social determinants that influence health. As shown in Fig. 1, the innermost layer contains  
118 demographic and genetic factors which are largely unmodifiable. In contrast, the outer layers are modifiable  
119 to different degrees such as lifestyle (e.g., exercise and smoking), social and community networks (e.g., contact  
120 with supportive friends and family), living and working conditions (e.g., access to health care and employment),  
121 and broader socio-economic, cultural, and environmental conditions (e.g., crime in the neighborhood). While this  
122 model was not intended to provide explicit testable hypotheses,<sup>4</sup> the factors within each layer are expected to  
123 co-occur and impact each other, in addition to responding to external forces such as racism, and capitalism when  
124 it is focused on financial profits at the expense of societal benefits.

125 These early SDoH models motivated numerous studies<sup>17</sup> that analyzed associations among specific SDoH (e.g.,  
126 immigration status and home density<sup>7</sup>), their association with health outcomes (e.g., education and mortality<sup>18</sup>),  
127 and how they manifest within subpopulations (e.g., patients with diabetes<sup>19</sup>). More recently, organizations such  
128 as Centers for Disease Control and Prevention (CDC) and *Healthy People 2030 (HP-30)* have organized these

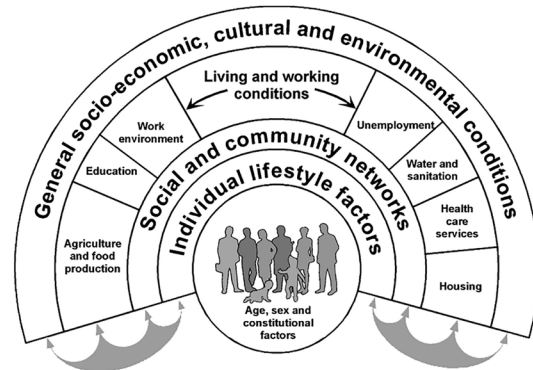

Fig. 1. The Dahlgren-Whitehead conceptual model aimed to visually show the inter-related layers of SDoH domains that influence health.

empirical results into SDoH domains that roughly map to the Dahlgren-Whitehead model. For example, *HP-30* organizes SDoH empirical studies into five SDoH domains: (1) Economic Stability; (2) Education Access and Quality; (3) Health Care Access and Quality; (4) Neighborhood and Built Environment; and (5) Social and Community Context. Furthermore, the PhenX program (that provides well-established measurement protocols for use in biomedical and translational research) has identified SDoH data collection protocols to enable more systematic data collection and analysis.<sup>20-22</sup>

While the above findings and categorizations have greatly improved our understanding of SDoH and their impact on health, they have been mostly analyzed based on snapshots of associations among a few factors and health outcomes. In contrast, SDoH models and recent empirical studies suggest that multiple SDoH tend to co-occur and impact each other. For example, during the pandemic, Hispanic and Black or African American individuals not only had a higher exposure to COVID-19 infections due to their front-line jobs and overcrowded living conditions, but also had a higher risk for serious infections due to prior conditions not addressed due to lack of healthcare access.<sup>4</sup> Similarly, undocumented immigrants with lower incomes living in neighborhoods with high pollution, combined with the stress of deportation, have an increased risk of multiple chronic conditions such as depression and lung cancer.<sup>7</sup> Such studies have resulted in the Centers for Medicare and Medicaid Services (CMS) emphasizing that SDoH are a multi-level construct which includes both individual and contextual factors that have complex interactions.<sup>23</sup>

The above co-occurrences of multiple SDoH and their impact on health directly reflect the interconnected layers of the Dahlgren-Whitehead shown in Fig. 1. However, analysis of such co-occurrences and their health outcomes requires large datasets with multiple datatypes that have only recently been made available through the *All of Us* program.

### ***All of Us*: Multiple Datatypes Across a Large Cohort of Underrepresented Americans**

The *All of Us* research program<sup>9-11</sup> (*All of Us*), funded by the National Institutes for Health since 2015, aims to accelerate biomedical research to enable discoveries leading to individualized and equitable prevention and treatment. Such research is currently hampered due to the *limited range* of personal, clinical, social, and environmental variables available for the same individuals, *limited representation* in research datasets of socially marginalized populations, and *limited access* to individual-level data due to privacy laws.

To overcome these hurdles, *All of Us* provides three critical features: (1) a data repository that is projected to contain one million or more participants, with data from multiple sources including electronic health records (EHRs), health surveys, whole sequence genomic data, physical measurements, and personal digital information such as from Fitbits; (2) a cohort targeted to include 75% participants from populations underrepresented in research (race, ethnicity, gender, sex, sexual orientation, and disability) oversampled from the US population; and (3) strictly-enforced rules to prevent reidentification of participants by disallowing the download of any participant data, or reporting research results for subgroups less than 20. These rules allow analysis of the *All of Us* data to be categorized as non-human subjects research, which combined with training and personal authentication by researchers, has resulted in a substantial reduction in administrative hurdles.

As of 12/30/22 (Controlled Tier, version 6), *All of Us* contained 372,397 total participants, with 8.6% who had attempted all 9 health surveys (7 related to demographics and general health, and 2 related to COVID-19), and 26.5% who had genomic data. Critical to the current study is the recent addition of a survey specifically targeted to SDoH questions, which has been attempted by 15.5% in the *All of Us* cohort. A preliminary analysis revealed that SDoH appear to be distributed across multiple health surveys and EHR codes, with participants providing those data at different times on a rolling basis. However, little is known about the range and response of SDoH in *All of Us*, and how they co-occur to form subtypes, a critical step for selecting the methods to identify and interpret SDoH subtypes.

### **Computational Methods to Identify and Interpret Subtypes**

A wide range of studies<sup>24-32</sup> on topics ranging from molecular to environmental determinants of health have shown that most humans tend to share a subset of characteristics (e.g., comorbidities, symptoms, genetic variants), forming distinct subtypes (also referred to as *subgroups* or *subphenotypes* depending on the condition and variables analyzed). A primary goal of precision medicine is to identify such subtypes and infer their underlying disease processes to design interventions targeted to those processes.<sup>25,33</sup> Methods to identify subtypes include: (a) investigator-selected variables such as race for developing hierarchical regression

models,<sup>34</sup> or assigning patients to different arms of a clinical trial, (b) existing classification systems such as the Medicare Severity-Diagnosis Related Group (MS-DRG)<sup>35</sup> to assign patients into a disease category for purposes of billing, and (c) computational methods such as classification<sup>36-38</sup> and clustering<sup>28,39</sup> to discover subtypes.

Several studies have used computational methods to identify subtypes, each with critical trade-offs. Some studies have used *combinatorial* approaches<sup>40</sup> (identify all pairs, all triples etc.), which are intuitive, but which can lead to a combinatorial explosion (e.g., enumerating combinations of the 31 Elixhauser comorbidities would lead to 2<sup>31</sup> or 2147483648 combinations), with most combinations that do not incorporate the full range of symptoms (e.g., the most frequent pair of symptoms ignores what other symptoms exist in the profile of patients with that pair). Other studies have used *unipartite* clustering methods<sup>38,39</sup> (clustering patients or comorbidities, but not both together) such as k-means, and hierarchical clustering; and dimensionality-reduction methods such as principal component analysis (PCA) to help identify clusters of frequently co-occurring comorbidities.<sup>40-46</sup> However, such methods have well-known limitations including the requirement of inputting user-selected parameters (e.g., similarity measures, and the number of expected clusters), in addition to the lack of a quantitative measure to describe the quality of the clustering (critical for measuring the statistical significance of the clustering). Furthermore, because these methods are unipartite, there is no agreed-upon method to identify the patient subgroup defined by a cluster of variables, and vice-versa.

More recently, bipartite network analysis<sup>47</sup> (see Appendix A for additional details) has been used to address the above limitations by automatically identifying *biclusters*, consisting of patients and characteristics simultaneously. This method takes as input any dataset such as *All of Us* participants and their SDoH, and outputs a quantitative and visual description of biclusters (containing both participant subgroups, and their frequently co-occurring SDoH). The quantitative output generates the number, size, and statistical significance of the biclusters,<sup>48-50</sup> and the visual output displays the quantitative information of the biclusters through a network visualization.<sup>51-53</sup> Bipartite network analysis therefore enables (1) the automatic identification of biclusters and their significance, and (2) the visualization of the biclusters critical for their clinical interpretability. Furthermore, the attributes of participants in a subgroup can be used to measure the subgroup risk for an adverse outcome, to develop classifiers for classifying a new participant into one or more of the subgroups, and to develop a predictive model that uses that subgroup membership for measuring the risk of an adverse outcome for the classified participant.

However, while several studies<sup>50,54-61</sup> have demonstrated the usefulness of bipartite networks for the identification and clinical interpretation of subgroups, there has been no systematic attempt to identify SDoH subtypes mainly because of the lack of large cohorts containing a wide coverage of SDoH. The *All of Us* program provides an opportunity to use bipartite networks for the identification and interpretation of SDoH subtypes using a wide range of variables in a large cohort, and for analyzing their risk for health outcomes, a critical step in advancing precision medicine.

## D. Method

### Research Questions

Our analysis was guided by two research questions targeting the *All of Us* dataset:

1. *What is the range and response to survey questions related to SDoH?*
2. *How do SDoH co-occur to form subtypes, and what are their risk for adverse health outcomes?*

### Expert Panel

The selection of the research questions, variables, cohort, methods, results, and their interpretation were guided by an expert panel consisting of SDoH researchers with a professional background in applied demography, gerontology, and rehabilitation, who worked closely with the machine learning and biostatistics researchers. The overall project and manuscript were examined by an ethicist for bias, stigma, and perpetuation of stereotypes. The examination of each step in the project is therefore aligned with the human-centered artificial intelligence approach.<sup>62-64</sup>

### Data Description

*Study Population.* In Question-1, we analyzed the full *All of Us* cohort (n=372,397) and characterized their responses to all the SDoH identified by the expert panel (described in the Variables subsection). For Question-

2, we analyzed all participants (n=12,913) that had valid responses to the SDoH identified in Question-1, and used them to identify subtypes, and their risks for specific outcomes.

**Variables.** For Question-1, the expert panel was asked to review all 1113 questions across 7 *All of Us* non-COVID health surveys, each of which is attempted once per participant (*The Basics, Lifestyle, The Basics, Personal Medical History, Health Care Access & Utilization, Family Health History, and SDoH*), and the 2843 Systematized Nomenclature of Medicine (SNOMED) codes related to SDoH.<sup>65</sup> The expert panel arrived at a consensus for the SDoH across the surveys and the SNOMED codes. As the SDoH-related SNOMED codes in the EHR had very low usage (see Appendix B for a characterization), they were not further characterized.

In Question-2, to identify and analyze the SDoH subtypes, we used the following variables:

- Independent variables included the SDoH factors identified from Question-1.
- Covariates including 3-digit zip code (to determine if participants in each subtype came from a state that accepted Medicaid expansion providing greater access to health insurance), and demographics (age, sex, race).
- Outcomes included: (1) Depression was selected as it is a common health outcome when individuals encounter SDoH in their daily lives such as long-term stress resulting from racism,<sup>66</sup> and dysregulation of the hypothalamic-pituitary-adrenal axis (HPA) axis.<sup>67</sup> Depression was defined as having a positive response to both of the following questions in the *The Basics* survey (“Are you still seeing a doctor or health care provider for depression?” and “Has a doctor or health care provider ever told you that you have Depression?”) or having SNOMED codes related to depression Codes in their EHR (35489007, 36923009, 370143000, 191616006, or 66344007), (2) Delayed Medical Care was selected as it often results from the lack of medical insurance, which can impact the use of medical care when needed leading to poorer health outcomes.<sup>68</sup> Delayed medical care was defined as having one or more positive responses to 9 survey questions (delayed care due to: transportation, rural, nervousness, work, childcare, copay, elderly care, out of pocket, and deductible) from the *Health Care Access & Utilization* survey. (3) Emergency Room (ER) Visits in Last Year was selected because lack of medical insurance often results in individuals not seeking early medical care when needed, leading to an exacerbation of conditions precipitating one or more ER visits.<sup>69</sup> As the survey questions that we used for SDoH subtyping were based on outcomes in the past year, we defined ER visits for a participant as having one or more ER visits (CPT 99281-99285) one year preceding the date when the SDoH survey was completed.

## Analytical Approach

**Question-1:** What is the range and response to survey questions related to SDoH?

To address this question, we characterized all SDoH in *All of Us* at two levels of granularity: (1) SDoH questions based on the surveys used to collect the data, and (2) SDoH factors, which were categories of the SDoH questions to form a coarser grained classification (see Table-1 which explains SDoH questions, factors, and subtypes). These two levels of SDoH granularity in *All of Us* were characterized as follows:

### Identification and Coding of SDoH (SDoH Questions and SDoH Factors)

**A. Identification and Coding of SDoH Questions in All of Us.** Members of the expert panel independently used their domain knowledge about SDoH to identify and code the SDoH questions, and to examine their range with respect to the five *HP-30* domains using the following steps: (1) reviewed all 1113 questions across 7 health surveys (excluding 2 related to COVID-19), and extracted all SDoH questions that were relevant; (2) transformed

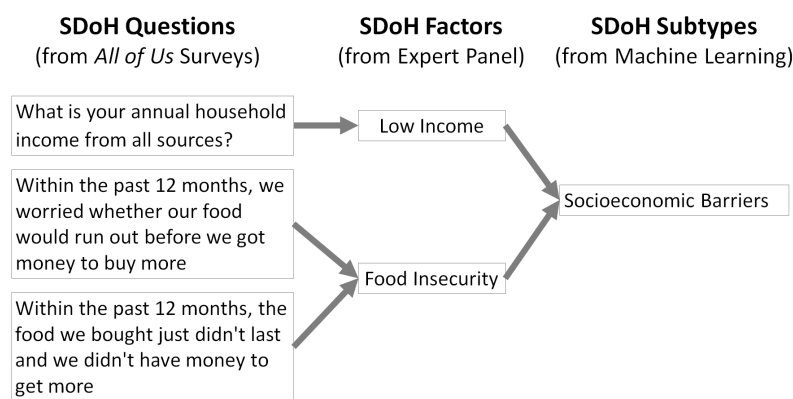

**Table 1.** Examples showing how the SDoH questions from the *All of Us* surveys which differed in their levels of granularity, were transformed by the expert panel into SDoH factors with uniform granularity to ensure consistency for analysis and interpretation, and clustered into SDoH subtypes through machine learning. The SDoH questions and factors were subsequently analyzed for coverage across the 5 *HP-30* domains (see Appendix C for more details).

all positive or value-free questions into negative phrases and abbreviated them for interpretability in the graphs (e.g., “How often do you have someone help you read health-related materials?” was changed into “No one to help read health materials”); (3) reverse coded, and dichotomized the abbreviated SDoH questions (e.g., Always/Often=1, and Never/Occasionally/Sometimes=0); and (4) categorized the SDoH questions into one of the five *HP-30* SDoH domains (Economic Stability, Education Access and Quality, Health Care Access and Quality, Neighbourhood and Built Environment, and Social and Community Context). The expert panel subsequently met and collaboratively resolved any differences between their coding schemes to arrive at a consensus (see Appendix-C for the 110 SDoH questions, and their consensus coding by the expert panel).

**B. Identification and Coding of SDoH Factors.** The expert panel arrived at a consensus to categorize one or more of the above SDoH questions in *All of Us*, into SDoH factors, and to examine their range with respect to *HP-30* using the following steps: (1) reviewed the subgrouping labels of questions in the *All of Us* surveys, and integrated them to categorize the SDoH into factors; (2) coded a participant as having a “1” for a SDoH factor if they had one or more of the questions within that factor which had been answered with a “1”; and (3) categorized the SDoH factors into one of the five *HP-30* SDoH domains (Economic Stability, Education Access and Quality, Health Care Access and Quality, Neighbourhood and Built Environment, and Social and Community Context) (see Appendix-C for the 110 SDoH questions, their consensus coding into 19 SDoH factors, and mapping to the 5 SDoH domains from *HP-30*).

### Range and Responses to SDoH Questions and Factors

The above knowledge-based classification of SDoH questions and SDoH factors were analyzed to examine their range (with respect to the five *HP-30* domains), and their response (across all participants in *All of Us*), using the following methods. (1) Bar graph displaying the number of participants that had valid answers (all responses other than “skip” or “choose not to answer”) to each of the SDoH questions, sorted by survey based on mean response, and then sorted by raw response within each survey. Additionally, to examine their range, each SDoH question/factor was colored by one of the five SDoH domains defined by *HP-30*. (2) Venn diagram showing how many participants had cross-sectionally valid responses to all identified SDoH questions/factors. (3) Table describing the number and proportion of race, ethnicity, sex, gender, and age between those that answered the SDoH questions/factors, versus those that did not have valid responses. (4) Frequency distribution of the number of SDoH questions/factors across participants that had valid responses for all the SDoH questions. The above plots are shown in the Results section.

**Question-2:** How do SDoH co-occur to form subtypes, and what are their associations with covariates and risks for adverse health outcomes?

**Data.** We used the cohort identified in Question-1 (participants who had valid answers to all the SDoH questions). However, examination of the SDoH questions revealed that some of them (e.g., cannot afford dental care, cannot afford prescriptions) had a finer level of granularity compared to others (e.g., single household). As the questions with a finer level of granularity tend to be more strongly co-related to each other in comparison to other coarser grained questions, they also tend to cluster together more strongly, confounding the interpretation of the subtypes. In contrast, as the SDoH factors had a more uniform granularity, and were at a level of abstraction that was appropriate to guide referral to the proper social services, we used them to identify the SDoH subtypes.

**Analytical Model.** To identify SDoH subtypes, their associations with outcomes and covariates, and their future translation into precision medicine, we used a three-part analytical framework called **Heterogenization, Integration, and Translation (HIT)**. As shown in Fig. 2, the *heterogenization* step was used to identify the subtypes through the use of bipartite modularity maximization<sup>48-50</sup> (see Appendix A for more details), the *integration* step was used to measure the association of each subtype to multiple datatypes,<sup>70</sup> and the *translation* step was used to qualitatively interpret the subtypes,<sup>70</sup> with the goal of developing in the future a decision-support system to translate the subtypes into clinical practice. The following describes the specific methods used in each of the HIT steps:

**1. Heterogenization: Identification of Subtypes.** As there were many participants that did not have valid answers to the SDoH questions, dropping them resulted in differences in the proportion of demographic variables compared with the full *All of Us* cohort. The data therefore needed to be adjusted to better reflect the overall *All of Us* participants. To adjust the demographic distribution of the cohort to match the full *All of Us* cohort, we calculated the inverse probability weights (IPW)<sup>71,72</sup> for each participant in our cohort. IPW calculates weights to

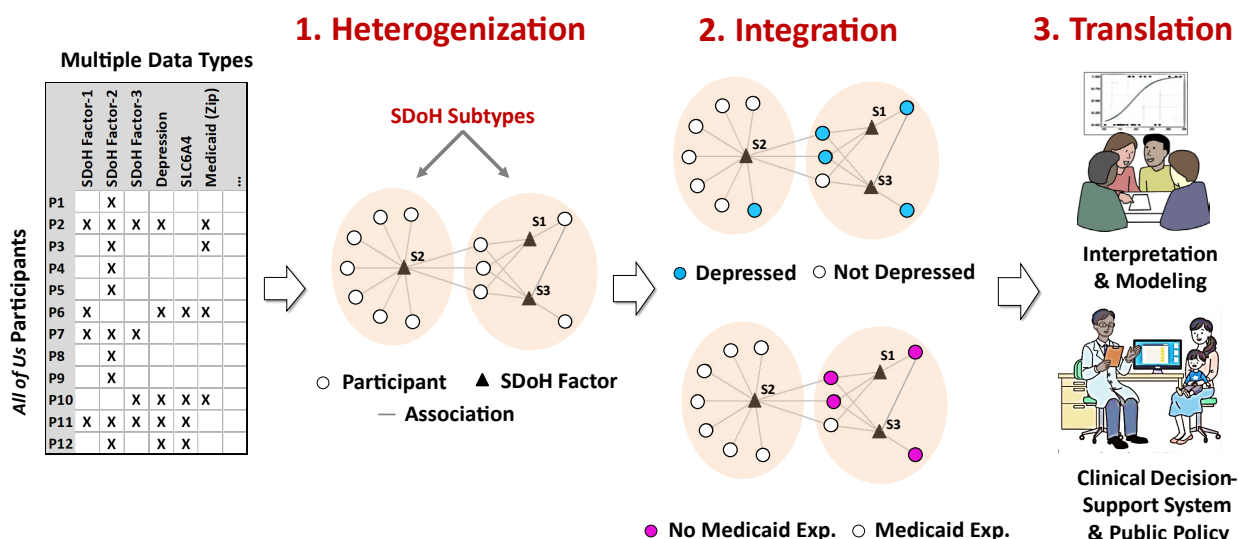

**Fig. 2.** The three steps of the HIT framework to analyze SDoH. (1) **Heterogenization** of the data to identify subtypes. (2) **Integration** of multiple datatypes such as from EHRs (e.g., depression), and state (e.g., to determine Medicaid expansion) to determine risk and enrichment of each subtype, and (3) **Translation** of subtypes through interpretation and predictive modeling, with the goal of designing clinical decision-support systems and public policy.

329 proportionally boost the values of participants that are underrepresented in our cohort, with respect to a  
 330 comparison such as the full *All of Us* data, using the method similar to an earlier study of *All of Us*<sup>73</sup> (see Appendix  
 331 E). Next, we multiplied the IPW generated weights with the original binary values for each participant in our  
 332 cohort, and used *min-max* to range-normalize those weights within each SDoH factor. Finally, to test the  
 333 replicability of the SDoH factor biclustering, we randomly divided the dataset into a training and a replication  
 334 dataset.

335 We identified subtypes in the training dataset, and tested the degree to which the SDoH factor co-occurrences  
 336 replicated in the test dataset using the following steps: (1) modelled participants and SDoH factors as a weighted  
 337 bipartite network (see Step-1 in Fig. 2) where nodes were either participants (circles), or SDoH factors (triangles),  
 338 and the associations between participant-SDoH factor pairs were weighted edges (lines) generated from IPW.  
 339 The inclusion of IPW generated weights enabled the network to represent the demographic distribution of the  
 340 full *All of Us* data; (2) used a bipartite modularity maximization algorithm,<sup>48-50</sup> (which takes edge weights into  
 341 consideration) to identify the number of biclusters, their members, and measure the degree of biclusteredness  
 342 through bicluster modularity (Q, defined as the fraction of edges falling within a cluster, minus the expected  
 343 fraction of such edges in a network of the same size with randomly assigned edges); (3) measured the  
 344 significance of Q by comparing it to a distribution of the same quantity generated from 1000 random permutations  
 345 of the network, while preserving the network size (number of nodes), and the distribution of weighted edges for  
 346 each participant; (4) used the Rand Index (RI) to measure the degree to which SDoH occurred and did not co-  
 347 occur in the same cluster in the training and test datasets,; and (5) measured the significance of RI by comparing  
 348 it to the mean of a distribution of the same quantity generated by randomly permuting the training and replication  
 349 datasets 1000 times, while preserving the size of the networks.

350 **2. Integration: Risk and Enrichment of Subtypes.** We used logistic regression to measure the odds ratio (OR) for  
 351 each subtype compared pairwise to each of the other subtypes, for the three outcomes (Depression, Delayed  
 352 Medical Care, and ER Visits in Last Year), and for living in a state with Medicaid expansion. To adjust for the  
 353 difference in demographics due to the missingness, we used weights generated from IPW for each participant,  
 354 and the comparisons were adjusted for demographics (age, sex, race) and corrected for multiple testing within  
 355 each outcome using FDR. As 1688 (13.1%) participants did not have 3-digit zip code information, we used IPW  
 356 to measure the weights of the cohort, and used them to account for potential sample selection bias.

357 **3. Translation: Interpretation of Subtypes.** The subtype interpretation was done using the following steps: (a)  
 358 used the *Fruchterman-Reingold*<sup>51</sup> and *ExplodeLayout*<sup>52,53</sup> algorithms to visualize the bipartite network along with  
 359 the risk for each of the outcomes; (b) asked the expert panel to independently label the subtypes, infer the  
 360 mechanisms that increase the risks in each subtype for the three outcomes (Depression, Delayed Medical Care,  
 361



361  
362  
363  
364  
365  
366  
367  
368  
369  
370  
371  
372  
373  
374  
375  
376  
377  
378  
379  
380  
381  
382  
383  
384  
385  
386  
387  
388  
389  
390  
391  
392  
393  
394  
395  
396  
397  
398  
399  
400  
401  
402  
403  
404  
405  
406  
407  
408  
409  
410  
411  
412

and ER Visits in Last Year) with potential strategies to reduce those risks, and then collaboratively come to a consensus; and (c) asked an ethicist to examine the results and their interpretations for bias, stigma, and perpetuation of stereotypes.

## E. Results

**Question-1:** What is the range and response to survey questions related to SDoH?

**Identification and Coding of SDoH Questions and Factors.** The expert panel identified 110 questions from 4 surveys (*The Basics*, *Overall Health*, *Healthcare Access & Utilization*, and *SDoH*). Of these, 110 were abbreviated, and 48 were negatively-worded and coded (see Appendix C). The 110 SDoH questions were further categorized into 19 SDoH factors (one of these was *Delayed Medical Care* that was used as an outcome).

**Response to SDoH Questions and Factors.** As shown in Figure 3A, the number of valid responses for each of the 110 SDoH questions was largely dictated by the surveys in which they were solicited. SDoH from 2 surveys (*The Basics*, *Overall Health*) had the most valid responses (mean=349434, SD=23556), followed by *Healthcare Access & Utilization* (mean=149898, SD=6146), and finally the *SDoH* survey (mean=55960, SD=1083). This pattern of responses matched how answers to each of the surveys were solicited: at enrollment, all participants are required to do *The Basics*, and *Overall Health* surveys, and then on a rolling basis the other surveys responses are solicited. The *SDoH* survey is the latest survey that was solicited, which explained their lowest number of responses. As shown in Fig. 3B, this pattern of missingness held for the responses at the SDoH factor level, which was not unexpected as the SDoH factors were aggregations of the SDoH questions. However, as shown in Fig. 3A and 3B by the uneven number of valid responses within each survey block, there were several SDoH questions that had invalid responses (“skip” or “chose not to answer”) at both levels of granularity: *The Basics*: 6%; *Healthcare Access & Utilization* 6.1%; *Overall Health*: 4.39%; and *SDoH*: 2.61%. Furthermore, the proportion of valid to invalid responses between them was significantly different for the SDoH questions ( $\chi^2(2, N=365237)=57.489, P<.001$ ), and for the SDoH factors ( $\chi^2(2, N=372063)=75.637, P<.001$ ).

**Range of SDoH Questions and Factors.** As shown by the colored bars in Figure 3, the surveys spanned the full range of the five SDoH *HP-30* domains. The SDoH questions in *The Basics* and *Overall Health* surveys were predominantly related to economic stability (blue) and social and community context (purple), those in *Healthcare Access & Utilization* survey were all related to that topic (green), whereas those from the *SDoH* survey were a mix of all four domains. Overall, the four surveys contained 110 SDoH questions that together had 100% coverage of the five *HP-30* domains: Social and Community Context=38; Neighborhood and

A. Valid Responses to SDoH Questions (d=110)

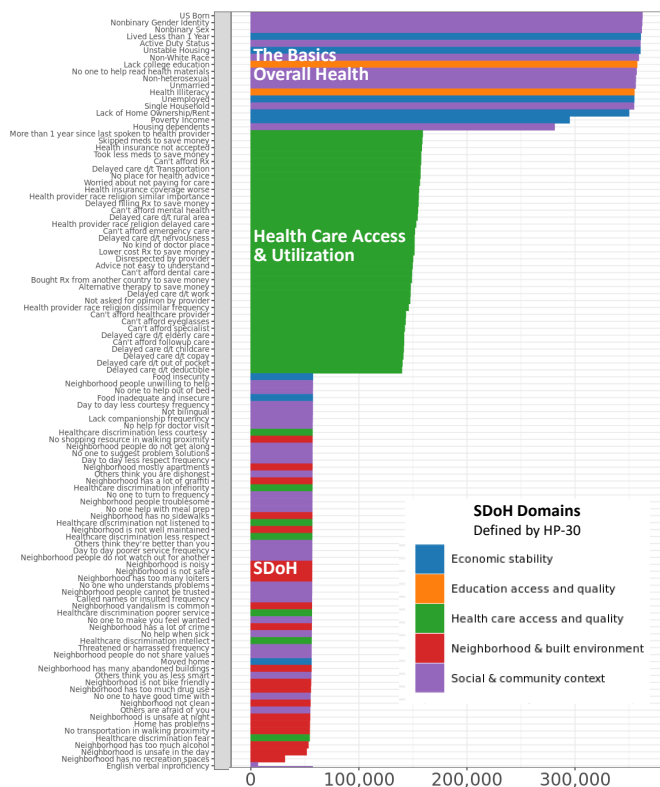

B. Valid Responses to SDoH Subdomains (d=19)

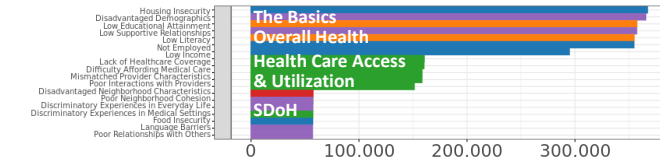

**Fig. 3.** The number of valid responses for (A) 110 SDoH questions, and (B) 19 SDoH factors. The colors denote how the SDoH in each were categorized based on the 5 *HP-30* domains.

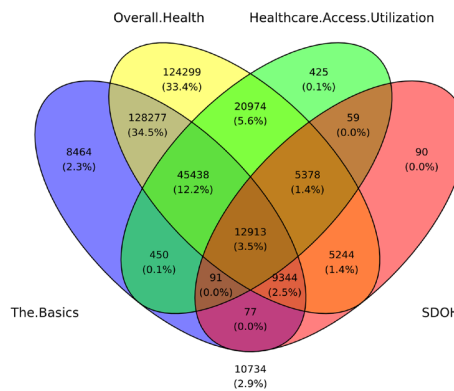

**Fig. 4.** Venn diagram showing 12,913 participants (3.5% of the full cohort), who had valid responses to all 98 SDoH questions.

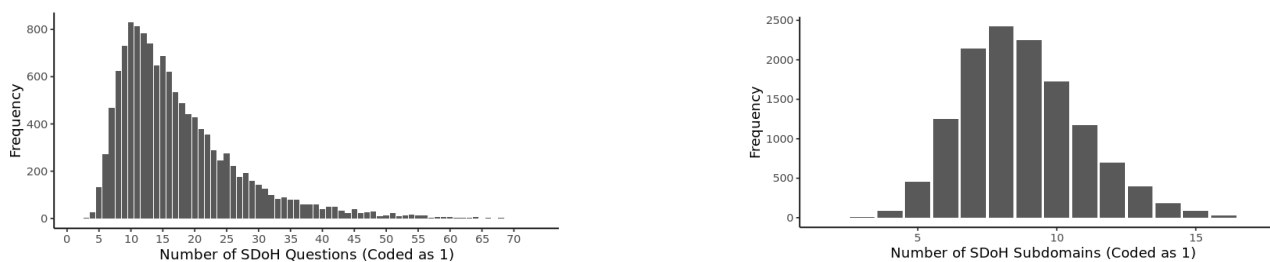

**Fig. 5.** Frequency distribution of (a) number of co-occurring responses to **SDoH questions** across the 12,913 participants with valid answers to the 98 SDoH questions, and (b) number of co-occurring **SDoH factors** across 19 SDoH factors.

413 Built Environment=19; Economic Stability=10; Education Access and Quality=2; Health care Access and  
 414 Quality=42. This characterization suggests that while the SDoH in *All of Us* have broad domain coverage across  
 415 the surveys, analysis of them requires access to all four surveys, each of which have different levels of  
 416 completion and valid responses.

417 **Cohort with Maximized Valid Responses.** Given the large degree of missingness in 2 of the 4 surveys, we  
 418 could not use multiple imputation to estimate the values. We therefore had to find a subset of participants that  
 419 had valid responses to all the SDoH questions. An examination revealed that two SDoH questions had <10%  
 420 responses (*English Verbal Frequency*=1.67%, and *Neighborhood has no recreation spaces*=8.4%), accounting  
 421 for the largest loss in cohort size with valid responses. These questions were therefore dropped from further  
 422 analysis. Furthermore, one question required a branched response (*Living Situation* branching to *Did not Live in*  
 423 *a House*) which were merged. Finally, as we used *Delayed Medical Care* as an outcome, 9 questions related to  
 424 that topic were removed, resulting in a total of 98 SDoH questions. As shown in Fig. 4, a Venn diagram of the  
 425 overlap among the valid responses across the surveys revealed that 12,913 participants had valid responses to  
 426 all 98 SDoH questions.

427 **Co-occurrence of the Number of SDoH across Responders.** As shown in Fig. 5, participants had a median  
 428 of 15 SDoH question co-occurrences and a median of 9 SDoH factors co-occurrences. Furthermore, participants

| Demographics        |                                  | All AoU Participants:<br>372,397 (100%) | All AoU Participants with<br>valid <sup>a</sup> SDoH answers:<br>12,913 (3.5%) |
|---------------------|----------------------------------|-----------------------------------------|--------------------------------------------------------------------------------|
| <b>Race</b>         | <b>White</b>                     | 201149 (54.01%)                         | 11279 (87.35%)                                                                 |
|                     | <b>Black or African American</b> | 73383 (19.71%)                          | 482 (3.73%)                                                                    |
|                     | <b>Asian</b>                     | 12459 (3.35%)                           | 324 (2.51%)                                                                    |
|                     | <b>Other or &gt;1 population</b> | 26890 (7.22%)                           | 343 (2.66%)                                                                    |
|                     | <b>None Indicated</b>            | 58516 (15.71%)                          | 485 (3.76%)                                                                    |
| <b>Ethnicity</b>    | <b>Not Hispanic or Latino</b>    | 288227 (77.4%)                          | 12095 (93.67%)                                                                 |
|                     | <b>Hispanic or Latino</b>        | 66704 (17.91%)                          | 751 (5.82%)                                                                    |
|                     | <b>Additional Options</b>        | 17466 (4.69%)                           | 67 (0.52%)                                                                     |
| <b>Sex at birth</b> | <b>Female</b>                    | 222495 (59.75%)                         | 8236 (63.6%)                                                                   |
|                     | <b>Male</b>                      | 138831 (37.28%)                         | 4674 (36.09%)                                                                  |
|                     | <b>Intersex</b>                  | 80 (0.02%)                              | 20 (0.15%)                                                                     |
|                     | <b>Additional Options</b>        | 10991 (2.95%)                           | 20 (0.15%)                                                                     |
| <b>Gender</b>       | <b>Female</b>                    | 220833 (59.3%)                          | 8113 (62.82%)                                                                  |
|                     | <b>Male</b>                      | 138140 (37.09%)                         | 4642 (35.95%)                                                                  |
|                     | <b>Non Binary</b>                | 920 (0.25%)                             | 60 (0.46%)                                                                     |
|                     | <b>Transgender</b>               | 464 (0.12%)                             | 20 (0.15%)                                                                     |
|                     | <b>Additional Options</b>        | 12040 (3.23%)                           | 79 (0.61%)                                                                     |
| <b>Age</b>          |                                  | Median=56 (19-122 <sup>b</sup> )        | Median=58(19-93)                                                               |

**Table 2.** The demographic differences between the total *All of Us* participants, and those that had valid answers to all 110 SDoH questions. <sup>a</sup>Participants that completed all questions, and did not skip, or choose not to answer a question; <sup>b</sup>Age 122 = a participant chose the least birth year (1900). Participant counts less than 20 are shown as a count of 20 based on the *All of Us* reporting rules.

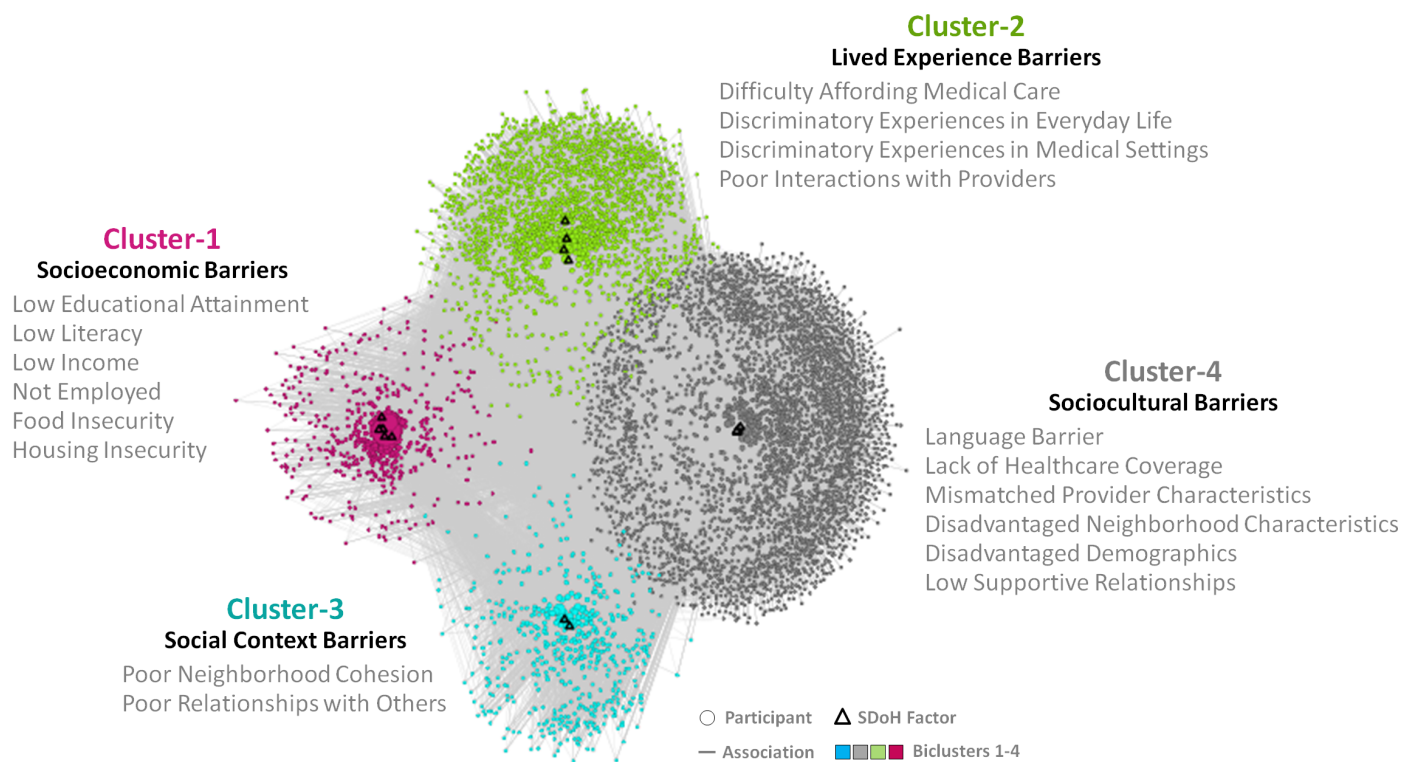

**Fig. 6.** Four biclusters in the training dataset consisting of subgroups of participants ( $n=6492$ ), and their most frequently co-occurring SDoH factors ( $d=18$ ) (see Appendix B for SDoH questions related to the SDoH factors clustered within each subtype). The biclustering was significant ( $Q=0.13$ , random- $Q=0.11$ ,  $z=7.5$ ,  $P<0.001$ ) and the co-occurrence of the SDoH factors significantly replicated in the replication dataset (Real-RI=0.88, Random-RI=0.62,  $P<0.001$ ). Across all three outcomes, Cluster-1 had a significantly higher OR compared to Cluster-4. The cluster labels in bold text represent the consensus interpretation by the expert panel.

of color or racial/ethnic minorities, who had valid responses to the 110 SDoH questions, had a significantly higher median number of co-occurring SDoH compared to the equivalent White population (median participants of color or racial/ethnic minorities=20, median White=14,  $P<.001$ ). These results show the high co-occurrences of SDoH at both levels of granularity, with a significant difference in median co-occurrences between the White and the participants of color or racial/ethnic minority populations, with valid responses.

**Participant Demographics with Valid Responses to SDoH Questions.** As the cohort size dropped to 3.5%, we analyzed how that impacted the demographic distribution compared with the overall *All of Us* data. As shown in Table 2, there were statistically significant differences in race ( $\chi^2(5, N=372,397)=2073.1$ ,  $P<.001$ ), and ethnicity ( $\chi^2(9, N=372,397)=6292.2$ ,  $P<.001$ ) between the two cohorts, after multiple testing correction, with a higher proportion of White participants having valid answers compared to participants of color, or racial or ethnic minorities. Furthermore, there was a statistically significant difference in age between the participants who had valid answers, versus those that did not ( $H(1)=148.08$ ,  $P<.001$ ). These results show the demographic differences between the cohort with complete and valid answers to the SDoH questions, in comparison to the full *All of Us* data, necessitating the need for weights generated from IPW to address those imbalances.

**Question-2:** How do SDoH factors co-occur to form subtypes, and what are their risk for adverse health outcomes?

The cohort used to identify the subtypes consisted of 12,913 participants, of which 12,886 had valid IPW weights. The latter cohort were split randomly into the training and replication datasets, each with complete data for 18 SDoH factors (identified in Question-1), in addition to the three outcomes (depression, delayed medical care and ER visits in last year), and covariates (demographics).

### 1. Heterogenization: Identification of Subtypes

The subtypes were identified by using a bipartite network where the edges were weighted using the IPW generated weights to account for the imbalance in demographics between our cohort and the full *All of Us* data.

452  
453  
454  
455  
456  
457  
458  
459  
460  
461  
462  
463  
464

The weighted bipartite network of the training dataset (n=6492) and the 18 SDoH factors revealed 4 biclusters with statistically significant bicluster modularity (Q=0.13, random-Q=0.11, z=7.5, P<0.001). As shown in Fig. 6, there were four clusters with participant subgroups and their most frequently co-occurring SDoH factors (*Cluster-1* (pink): low education attainment, low literacy, low income, not employed, food insecurity, and housing insecurity; *Cluster-2* (green): difficulty affording medical care, discriminatory experiences in everyday life, discriminatory experiences in medical settings, poor interactions with providers; *Cluster-3* (blue): poor neighborhood cohesion, and poor relationships with others; and *Cluster-4* (gray): disadvantaged demographics, language barriers, lack of healthcare coverage, mismatched provider characteristics, disadvantaged neighborhood characteristics, and low supportive relationships). These co-occurrences of SDoH factors, significantly replicated in the replication data set (Real-RI=0.88, Random-RI=0.62, P<.001). As shown in Fig. 7, while the 18 SDoH factors have a hierarchical relationship with the five *knowledge-driven HP-30* domains (shown on the left), those same SDoH factors have a more complex relationship with the four *data-driven* biclusters (shown on the right).

465

## 2. Integration: Risk and Enrichment of Subtypes

466  
467  
468  
469  
470  
471  
472  
473  
474  
475  
476  
477  
478  
479  
480  
481  
482

Table 3 shows the association of each subtype to the three outcomes. As shown by the dark orange row, Cluster-1 (low educational attainment, low literacy, low income, not employed, food insecurity, and housing insecurity) had a significantly higher OR for each of the three outcomes compared to Cluster-4 (mismatched provider characteristics, disadvantaged neighborhood characteristics, lack of healthcare coverage, disadvantaged demographics, low supportive relationships, language barrier). Furthermore, within the *Depression* outcome, each of the clusters had a significantly higher OR compared to one other cluster forming a ranking of risk among all the four clusters (1>3>2>4). In contrast, *Delayed Medical Care* had two other significant associations (2>1, 3>4), with *ER Visit in the Last Year* having only the one significant pairwise association that fit into the overall trend.

483  
484  
485  
486  
487  
488

As shown in Table 4, this trend continued in the enrichment analysis of association with living in a state with *No Medicaid Expansion*. As shown, Cluster-1 had a significantly higher OR compared to Cluster-4, in addition to the other clusters. The overall results suggest that Cluster-1 and Cluster-4 form “book ends” representing the high and low ends of risk among the clusters.

489

## 3. Translation: Interpretation of SDoH Subtypes and Design of Potential Interventions

490  
491  
492  
493  
494

The expert panel examined the co-occurrences of SDoH factors within each bicluster shown in the network visualization (Fig. 6), and integrated them with the quantitative ORs in Table 3 and 4. The consistent “book ends” result where Cluster-1 had significantly higher ORs compared with Cluster-4 across all four variables was of strong interest, and interpreted as follows: (1) **Cluster-1** was labeled *Socioeconomic Barriers* as it contained multiple high risk SDoH. These co-occurring SDoH could have resulted from cascades over time such as low

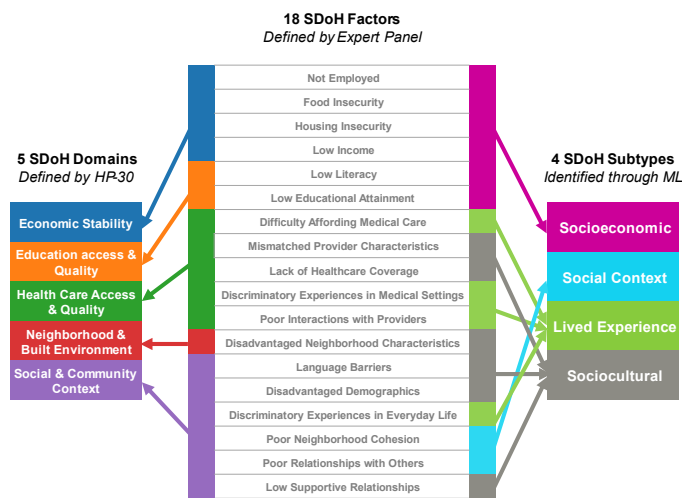

**Fig. 7.** 18 SDoH factors (center) have a hierarchical relationship with the 5 SDoH domains define by HP-30 (left), both of which are knowledge driven. In contrast, the SDoH factors have a complex relationship with the SDoH subtypes (right) identified through machine learning (ML), reflecting how they co-occur in the real-world, and aligned with models such as the Dahlgren-Whitehead model (shown in Fig. 1).

| Cluster Comparison      |   | Outcomes                                 |                                           |                                          |
|-------------------------|---|------------------------------------------|-------------------------------------------|------------------------------------------|
| Cluster-A vs. Cluster-B |   | Depression                               | Delayed Medical Care                      | ER Visit in Last Year                    |
| 1                       | 2 | OR=1.7, CI=1.5-2, P-corr=2.5e-10 <.001   | OR=0.78, CI=0.67-0.92, P-corr=0.0038 <.01 | OR=1.2, CI=0.91-1.6, P-corr=0.24         |
| 1                       | 3 | OR=1.3, CI=1.1-1.6, P-corr=0.019 <.05    | OR=0.88, CI=0.72-1.1, P-corr=0.23         | OR=1.4, CI=0.96-1.9, P-corr=0.13         |
| 1                       | 4 | OR=4.2, CI=3.5-5.1, P-corr=3.5e-52 <.001 | OR=3.5, CI=3-4.1, P-corr=1.8e-53 <.001    | OR=1.8, CI=1.4-2.3, P-corr=0.00016 <.001 |
| 2                       | 3 | OR=0.79, CI=0.64-0.97, P-corr=0.022 <.05 | OR=1.2, CI=0.98-1.4, P-corr=0.094         | OR=1, CI=0.75-1.5, P-corr=0.8            |
| 2                       | 4 | OR=2.3, CI=1.9-2.7, P-corr=5.2e-21 <.001 | OR=4.3, CI=3.7-5, P-corr=3.4e-85 <.001    | OR=1.3, CI=1-1.7, P-corr=0.12            |
| 3                       | 4 | OR=2.9, CI=2.3-3.5, P-corr=1.5e-21 <.001 | OR=3.6, CI=3-4.4, P-corr=1.6e-38 <.001    | OR=1.4, CI=0.95-1.9, P-corr=0.13         |

**Table 3.** Across all three outcomes, Cluster-1 had a significantly higher risk compared to Cluster-4 (dark orange row). The Depression outcome had a distinct ranking of risks (light orange), whereas the other two outcomes had a subset of them.

educational attainment, potentially leading to lower rates of employment and lower income, with higher rates of food and housing insecurity. Such cascading factors can be perceived as being relatively unmodifiable, leading to a higher risk for chronic stress and depression. Furthermore, the strong association of this subtype with the outcomes *Delayed Medical Care* and *ER Visits in Past Year*, and that participants in this subtype were more likely to be from a US state with *No Medicaid Expansion*, provided a more comprehensive understanding of this high-risk SDoH subtype. (2) **Cluster-4** was labeled *Sociocultural Barriers* as it contained a combination of SDoH related to disadvantaged neighborhood characteristics, and low supportive relations, in addition to language barriers, and mismatched provider interactions. In contrast to socioeconomic barriers in Cluster-1, many of the sociocultural barriers could be perceived as potentially modifiable, resulting in a lower risk for depression, delayed medical care, and ER visits. Participants that match this profile could be screened for language and communication barriers, useful for providing culturally-competent care, identifying providers that better match the profile of the individuals, and for providing resources to facilitate contact with matching nationality or cultural groups online or in the vicinity.

While Cluster-1 and Cluster-4 formed the “book ends” of risk across the three outcomes potentially caused by relative differences in the unmodifiability of their frequently co-occurring SDoH, **Cluster-2** was flagged as critical and labeled *Lived Experience Barriers*. The SDoH in this cluster included discriminatory experiences in everyday life and in medical settings, in addition to poor interactions with providers and difficulty in affording medical care. These frequently co-occurring SDoH could explain why this subtype had a significantly higher OR for *Delayed Medical Care* compared to Cluster-1. Finally, **Cluster-3** was labeled *Social Context Barriers* as the SDoH related to poor neighborhood cohesion and relationships with others. While not as critical as Cluster-1 and Cluster-2, this cluster still had significantly higher OR for depression compared to Cluster-4. Together, the four clusters could explain how different degrees of unmodifiability in frequently co-occurring SDoH might impact health outcomes.

The expert panel and the ethicist concluded that clinicians treating patients that match each subtype profile could be alerted of specific risks, and consequently motivate a discussion about mental health and consequences of delayed medical care, with the goal of collaboratively exploring options and solutions with the patients. The results could also be useful for resource planning in hospitals to ensure there was adequate staff to address the needs of populations they serve, and for proposing public policies to address the critical connection between specific combinations of SDoH, and their impact on public health.

Furthermore, the subtypes did not have a one-to-one mapping to the 5 SDoH domains defined by *HP-30*. As shown in Fig. 7, these data-driven clusters have a complex relationship with the SDoH domains and factors. While one subtype belonged to a single domain (subtype *Social Context* belonged to the domain *Social and Community Context*), three of the four subtypes belonged to two or more domains (e.g., the subtype *Socioeconomic Barriers* belonged to the domains *Economic Stability*, and *Education Access and Quality*). Such interdomain relationships reflect how SDoH co-occur in the real world reflecting the complex cross-domain interactions described in the Dahlgren-Whitehead model (Fig. 1). These relationships could be useful for refining conceptual models to explain the complex association between SDoH and adverse health outcomes, and to build more accurate SDoH models for predicting adverse health outcomes.

## F. Discussion

The mechanisms through which SDoH precipitate adverse health outcomes are complex consisting of many interacting factors and feedback loops among individual and environmental/contextual factors. While this phenomenon has been studied for more than three decades, critical hurdles for researchers have included the *limited range* of data types, *limited representation* of populations that have been socially marginalized, and *limited access* to individual-level data at scale due to privacy laws. Recognizing that *All of Us* has well-articulated plans and resources to overcome these limitations, but is still in a rapidly evolving stage, we conducted a systematic characterization of more than a hundred SDoH available in *All of Us*, and used them to identify SDoH

| Cluster Comparison      |   | Enrichment                               |
|-------------------------|---|------------------------------------------|
| Cluster-A vs. Cluster-B |   | No Medicaid Expansion                    |
| 1                       | 2 | OR=1.5, CI=1.3-1.8, P-corr=1.7e-05 <.001 |
| 1                       | 3 | OR=1.3, CI=1-1.6, P-corr=0.048 <.05      |
| 1                       | 4 | OR=1.3, CI=1.1-1.5, P-corr=0.0057 <.01   |
| 2                       | 3 | OR=0.99, CI=0.8-1.2, P-corr=0.97         |
| 2                       | 4 | OR=0.99, CI=0.86-1.2, P-corr=0.97        |
| 3                       | 4 | OR=1, CI=0.82-1.2, P-corr=0.97           |

**Table 4.** Cluster-1 had a significantly higher OR compared to Cluster-4 (dark orange) for no Medicaid expansion, in addition to Cluster-2 and Cluster-3 (light orange).

subtypes with the future goal of designing targeted interventions. This attempt led to the following opportunities and challenges related to data, methods, and theory.

### Data: Missingness and Granularity

*All of Us* data contained 110 SDoH across 4 surveys, and 93 SDoH-related SNOMED codes in the EMRs. While these provided a comprehensive coverage of SDoH with respect to domains and factors identified by *HP-30*, our analysis uncovered the following patterns of missingness and SDoH granularity.

*Missingness.* The analysis revealed three types of missingness: (1) *Rollout Missingness*: This type of missingness was largely dictated by how the surveys were rolled out to participants. As all participants at enrollment are required to do *The Basics*, and *Overall Health* surveys, they had the highest responses, followed by the later solicited surveys *Healthcare Access & Utilization*, and *SDoH* rolled out more recently in 2022. This order of rollout was the main source of missingness resulting in a precipitous reduction in cohort size for those that had answers to all the SDoH questions. (2) *Valid Answer Missingness*. As participants can choose not to answer any survey questions, the data contained “PMLs” related to “skip” and “choose not to answer”. These accounted for a much smaller reduction in cohort size for complete data. (3) *Low Usage Missingness*. Although there were 259 SDoH SNOMED codes, only 93 (3.3%) had such information for >20 participants that are allowed to be reported. This could be because most clinicians currently do not screen for SDoH, as it is typically done by the social worker. Furthermore, we also attempted to use 3-digit zip codes to determine which subtypes had a significant association to living in a state that did not offer Medicaid expansion. However, 13.1% (1688) of the participants did not have zip code information (which was adjusted by using IPW).

Together, the above three types of missingness impacted the size of the resulting cohort that had valid answers, in the following two ways: (1) a drastic reduction in cohort size by 93.5%. However, because of the size of the overall data (n=372,397), we were still left with a large cohort (n=12,886), which to the best of our knowledge is the largest set of individuals to be analyzed for such a wide range of SDoH; and (2) significant differences in the proportion of race, ethnicity, and age in the above cohort when compared to the overall *All of Us* population. Specifically, the cohort with valid answers had significantly more White, or non-Hispanic, or older participants, when compared to the overall cohort. This could potentially be because once a participant has been enrolled, there is a 90-day delay in sending subsequent solicitations to complete surveys, a policy that is currently being re-assessed due to its impact on missingness. We therefore had to correct this imbalance in demographic proportions by using IPW, with the goal of identifying subtypes that were representative of the overall *All of Us* cohort.

*Granularity.* Because our goal was to use machine learning methods to identify SDoH subtypes, we encountered uneven granularity in the SDoH questions. Some questions were fine-grained and highly correlated and therefore would cluster more strongly because of the nature of the granularity of the questions, not because of the SDoH mechanisms. To address this uneven granularity, and to make the results more interpretable, we used SDoH factors which had a coarser but more consistent level of granularity. We chose this approach because SDoH factors had already been defined, were understood by the expert panel enabling high domain fidelity, and appeared to be at the right level of abstraction useful for clinical applications such as referring a patient to the appropriate social services. However, because the use of coarse-grained variables loses information, future research could explore aggregating only those SDoH questions that are highly correlated, while preserving the rest at the finer level of granularity, and explore computational methods to merge SDoH questions into SDoH factors.

### Method: Scalability, Generalizability, and Extensibility

We designed the HIT analytical framework to be scalable enabling its use for the growing size of the data in *All of Us*, to be generalizable across cohorts and conditions, and to be extensible for including additional methods as needed in the future. Testing the HIT framework on the *All of Us* data provided insights for the strengths and limitations of the framework, and for the *All of Us* workbench where the analysis was conducted.

*Scalability.* We used three types of code to conduct the analysis for both research questions. (1) Automatically generated code to extract the cohort, produced by *All of Us* once a cohort was selected using the point and click interface. This code was adequately scalable and generalizable and so will not be discussed further. (2) Customized code to extract specific parts of the data. For example, the analysis of co-occurrences required customized code in R to plot the diagrams in Fig. 3. As expected, these tasks required strong programming skills,

597 but fortunately we did not encounter any coding or execution problems using the R or Python programming  
598 languages. However, there were significant server issues which hampered our analysis. Although the workbench  
599 instructions state that code running on the workbench for more than 2 weeks would be terminated and all  
600 intermediate results deleted, we frequently encountered our work disappearing at shorter intervals. These  
601 disruptions resulted in a higher consumption of the free server time credits, and fewer analyses that we could  
602 conduct due to the computation time. (3) Machine learning code we had previously developed and disseminated  
603 on CRAN<sup>74-76</sup> to conduct the bipartite network analysis and the significance testing, and to visualize the network.  
604 As this code was designed to be generalizable and scalable, we did not encounter any issues in the execution  
605 of our code (besides the same server issues mentioned above). Finally, the visualization of our networks worked  
606 as expected, and we used them to help interpret the patterns in the data.

607 *Generalizability.* Our code for the first two steps of the HIT framework is in Jupyter notebooks and have been  
608 used to analyze other cohorts that were filtered for age and prior conditions. For example, we extracted a cohort  
609 (n=4090) of participants with diabetes aged  $\geq 65$  with complete data on 18 SDoH variables selected through  
610 consensus by 2 experienced health services researchers, and guided by Andersen's behavioral model. The  
611 analysis<sup>77,78</sup> revealed 7 SDoH subtypes with statistically significant modularity compared with 100 random  
612 permutations of the data ( $All\ of\ Us=.51$ , Random Mean=.38,  $z=20$ ,  $P<.001$ ), and which were not only clinically  
613 meaningful, but also significant in different degrees for the outcome. Our subsequent attempt at increasing the  
614 number of SDoH variables from 18 to 110 for participants with diabetes that had valid answers, led to an  
615 extremely small cohort size (n=926) (see Appendix D) due to the missingness that we described above. While  
616 this reduction resulted in our current strategy of analyzing all participants regardless of condition or age, these  
617 experiments demonstrate that our approach is generalizable to other subsets of the data.

618 *Extensibility.* The HIT model is designed to be extensible to include other methods. For example, the model  
619 could use other biclustering (e.g., Non-negative Matrix Factorization<sup>79</sup>) and causal modeling methods, and use  
620 different types of classification (e.g., deep learning<sup>80</sup>), and prediction methods (e.g., subgroup-specific modeling  
621 <sup>38</sup>) to build the decision-support system in the Translational Step (Fig. 2). Furthermore, the model can integrate  
622 a wide range of data types to enable analysis of how each subtype is associated with them, resulting in a layered  
623 interpretation of the SDoH subtypes as we have demonstrated. For example, as the percentage of participants  
624 that have genomic information increases (currently more than 25% of our cohort had missing genomic  
625 information), our pipeline will be able to integrate such information into our analysis. Finally, the integration of  
626 different datatypes required a diverse team consisting of experts in machine learning, biostatistics, programming,  
627 clinical care, health services research, gerontology, and ethics to enable a 360 analysis and interpretation of the  
628 subtypes, and therefore aligned with the human-centered artificial intelligence approach.<sup>62-64</sup> Furthermore, the  
629 use of the workbench to share results through visualizations of the results operationalized *team-centered*  
630 *informatics*<sup>81</sup> designed to facilitate multidisciplinary translational teams<sup>82</sup> to work more effectively across  
631 disciplinary boundaries, with the goal of analyzing subtypes, and designing targeted interventions.

## 632 **Theory: Model Building, and Translational Implications**

633 The identification of SDoH subtypes has strong implications for model building in addition to translational  
634 applications. As shown in Fig. 7, while the current classification of five SDoH domains has a hierarchical  
635 relationship with the SDoH factors, the data-driven clusters have a more complex association with the same  
636 SDoH factors. This reflects the complexity of how SDoH occur in the real-world, while at the same time being  
637 interpretable for purposes of translation.

638 Future models should develop predictive models using the data-driven subtypes to determine whether they  
639 improve the accuracy of predicting adverse health outcomes when compared to models that do not use those  
640 subtypes. Because the subtypes were clinically interpretable, they could be used to build classification and  
641 predictive models, and used with an interface to develop a clinical decision-support system that help to triage  
642 patients to critical services. For example, the St. Vincent House (<https://www.stvhope.org/>) in Galveston, Texas  
643 provides several services to address SDoH including free walk-in clinical care, nurse practitioner with small co-  
644 pay requested, English and Spanish-speaking free mental health counseling, free dental health clinic, utility and  
645 rental assistance, case management, financial literacy, expanded food pantry, weekly free home delivery of  
646 pantry groceries, snack pack for people experiencing homeless, free transportation for doctor's appointment,  
647 immigration legal services, and spiritual counseling. Given the availability of this wide range of services in many  
648 communities across the US, a decision-support system could help to classify an individual based on their SDoH

profile into one or more of the subtypes, measure their risk for an adverse health outcome. Such information could be used by clinicians to collaboratively explore solutions with the patient to consider more of such local services based on the membership strength for a subtype, and the associated risk (Fig. 2, Step-3). At a population level, understanding health risks associated with clusters may assist institutions and organizations in developing more effective prevention programs.

### Notebooks for *All of Us* Community Use

Because the missingness in SDoH variables is expected to reduce, their characterization and subtyping will need to be repeated and verified for different cohorts. Therefore, we have made the following two sets of code available for general use by *All of Us* researcher community (accessible after creating a free account on *All of Us* and completing the required training):

1. *SDoH Valid Answer Tracker*. This set of notebooks generate four plots which can be used by other researchers on *All of Us* to characterize any cohort: (1) valid responses plot to show how many participants have data with valid responses, and colored by SDoH domains; (2) Venn diagram showing how many participants have valid responses for all questions within each survey; (3) frequency distribution plot showing co-occurrence of SDoH across the selected cohort. This set of tools should enable researchers to characterize SDoH across different cohorts, to help determine methods that are appropriate to adjust for missingness in those cohorts.

2. *SDoH Subtyper*. This set of notebooks can be used to conduct the following analyses: (1) bicluster modularity of a cohort with the 18 SDoH factors to identify the number and members of biclusters, and the measure Q representing the quality of the biclustering; (2) visualization of the bipartite network; and (3) significance of the network with respect to null models.

### Limitations

This study has two main limitations. The first emerges from the temporary limitations of the large amount of missingness in the survey data, precluding the use of imputation methods which assume a random distribution of missingness. We could therefore use only complete data, which led to a large drop in cohort size, and which also introduced a bias in the demographics requiring a rebalancing through IPW. While such rebalancing is typically done for large datasets, the IPW method requires judgement to decide which variables to include in the model, and therefore could have introduced additional unknown biases. Therefore, the model should be refined to determine which variables to include in the regression models that estimate the IPWs. However, because the clustering was similar between the unweighted and IPW weighted networks, we believe that the current subtypes are stable, meaningful, and represent the demographic composition of the full *All of Us* data, but which needs to be verified by redoing the analysis as the data becomes more complete. The limitation of missingness in the surveys is expected to be addressed as *All of Us* has recently removed the requirement of waiting for 90 days before a subsequent survey is given to an enrollee in the program, potentially reducing the degree of missingness. The second limitation is due to the high computational cost of empirically determining the significance of the biclustering. As such analysis is computationally expensive and time-consuming, it limited the experiments we could do to test different cohorts and models. We therefore look forward to the *All of Us* workbench providing the ability to run batch processes more efficiently, and which will be uninterrupted for extended periods of time (exceeding the current time window), which together could help alleviate this computational hurdle in the future.

### G. Conclusion

How SDoH impact health is a complex phenomenon involving many interconnected social, biological, and environmental factors which have yet to be fully elucidated. While this phenomenon has been studied for more than 30 years, the analyses have been hampered by the lack of large cohorts representing diverse populations with a wide range of SDoH variables measured, multiple datatypes, and with easy access by researchers. *All of Us* provides an unprecedented opportunity to directly address these limitations with the goal of doing justice to early conceptual models such as the social gradient and the Dahlgren-Whitehead model, both of which drew international attention to the complex ways in which individual and contextual SDoH factors impact health. The *All of Us* dataset is also timely because of the extensive health disparities that were revealed during the pandemic, which highlighted the critical need to address SDoH in the public and policy realms. However, because *All of Us* is still rapidly evolving to meet its target of one million participants or more, we conducted a systematic characterization of SDoH variables in *All of Us*, and used the results to guide the analysis of SDoH subtypes. The subtypes identified along with their risks could be used to design data-informed interventions,



700 resource planning strategies, and public health policies aimed towards reducing the risks for adverse outcomes.  
701 Careful consideration would be required to ensure that the identification of high-risk subtypes is not used in a  
702 way that stigmatizes subpopulations.

703 Our first goal of characterizing the data revealed the nature of the missingness in SDoH, and the uneven  
704 granularity in the SDoH questions. Both these results led us to select the IPW method to address the  
705 missingness, and analysis of subtypes at the SDoH factor level of granularity. Our second goal of identifying  
706 SDoH subtypes led not only to statistically significant biclusters, but also to their statistically significant  
707 replication, and meaningful domain interpretations. These results set the stage for further investigations to build  
708 and evaluate classification and prediction models for designing decision-support systems that alert clinicians of  
709 specific risks their patients face due to a combination of SDoH factors. The results also led to the design, use,  
710 and dissemination of general-purpose tools currently available on *All of Us* for other researchers, which will be  
711 useful to reanalyze the *All of Us* data as it grows over the next few years to directly address the high rate of  
712 missingness. These collaborative advances should position *All of Us* to revolutionize research for analyzing  
713 complex phenomena such as how SDoH impact health and beyond, with the goal of enabling a more equitable  
714 future that all of us deserve.

## 715 **H. Acknowledgments**

716 The authors thank Gautam Vallabha for his assistance in refining the analysis and the manuscript. This study  
717 was supported in part by the Clinical and Translational Science Award (UL1 TR001439) from the National Center  
718 for Advancing Translational Sciences at the National Institutes of Health, the University of Texas Medical Branch  
719 Claude D Pepper Older Americans Independence Center funded by the National Institute of Aging (NIA) at the  
720 National Institutes of Health (P30AG024832), MD Anderson Cancer Center, and the National Library of Medicine  
721 (R01 LM012095) at the National Institutes of Health, and by the NIA (K01AG058789). The content is solely the  
722 responsibility of the authors and does not necessarily represent the official views of the National Institutes of  
723 Health.

## I. References

1. Weida EB, Phojanakong P, Patel F, Chilton M. Financial health as a measurable social determinant of health. *PloS one*. 2020;15(5):e0233359.
2. Kushel MB, Gupta R, Gee L, Haas JS. Housing instability and food insecurity as barriers to health care among low-income americans. *Journal of general internal medicine*. 2006;21(1):71-77.
3. WHO. Social determinants of health. [https://www.who.int/health-topics/social-determinants-of-health#tab=tab\\_1](https://www.who.int/health-topics/social-determinants-of-health#tab=tab_1).
4. Dahlgren G, Whitehead M. The Dahlgren-Whitehead model of health determinants: 30 years on and still chasing rainbows. *Public health*. 2021;199:20-24.
5. Cook WK. Paid sick days and health care use: An analysis of the 2007 national health interview survey data. *American Journal of Industrial Medicine*. 2011;54(10):771-779.
6. Kaplan GA, Keil JE. Socioeconomic factors and cardiovascular disease: a review of the literature. *Circulation*. 1993;88(4 Pt 1):1973-1998.
7. CMS. Center for Migration Studies. Mapping Key Determinants of Immigrants' Health in Brooklyn and Queens. 2021; <https://cmsny.org/wp-content/uploads/2021/02/Mapping-Key-Health-Determinants-for-Immigrants-Report-Center-for-Migration-Studies.pdf>.
8. NEJM Catalyst. Social Determinants of Health (SDOH). *NEJM Catalyst* <https://catalyst.nejm.org/doi/full/10.1056/CAT.17.0312>. Accessed 6/28/2023.
9. Ramirez AH, Gebo KA, Harris PA. Progress With the All of Us Research Program: Opening Access for Researchers. *Jama*. 2021;325(24):2441-2442.
10. Denny JC, Rutter JL, Goldstein DB, et al. The "All of Us" Research Program. *The New England journal of medicine*. 2019;381(7):668-676.
11. Ramirez AH, Sulieman L, Schlueter DJ, et al. The All of Us Research Program: Data quality, utility, and diversity. *Patterns (New York, NY)*. 2022;3(8):100570.
12. Marmot MG. Status Syndrome: A Challenge to Medicine. *Jama*. 2006;295(11):1304-1307.
13. Adler NE, Ostrove JM. Socioeconomic status and health: what we know and what we don't. *Annals of the New York Academy of Sciences*. 1999;896:3-15.
14. Mackenbach JP, Bos V, Andersen O, et al. Widening socioeconomic inequalities in mortality in six Western European countries. *Int J Epidemiol*. 2003;32(5):830-837.
15. McDonough P, Duncan GJ, Williams D, House J. Income dynamics and adult mortality in the United States, 1972 through 1989. *American journal of public health*. 1997;87(9):1476-1483.
16. Goran D, Whitehead M. Policies and strategies to promote social equity in health. Background document to WHO - Strategy paper for Europe, 1991. *Arbetsrapport, Institute for Futures Studies*. 2007;14.
17. Lucyk K, McLaren L. Taking stock of the social determinants of health: A scoping review. *PloS one*. 2017;12(5):e0177306.
18. Muller A. Education, income inequality, and mortality: a multiple regression analysis. *BMJ (Clinical research ed)*. 2002;324(7328):23-25.
19. Hill-Briggs F, Adler NE, Berkowitz SA, et al. Social Determinants of Health and Diabetes: A Scientific Review. *Diabetes care*. 2020;44(1):258-279.
20. NIMHD. PhenX Social Determinants of Health Assessments Collection. 2022; <https://www.nimhd.nih.gov/resources/phenx/>. Accessed Januray, 2023.
21. Hamilton CM, Strader LC, Pratt JG, et al. The PhenX Toolkit: get the most from your measures. *American journal of epidemiology*. 2011;174(3):253-260.
22. PhenX. Social Determinants of Health Collections. 2017; <https://www.phenxtoolkit.org/collections/view/6>.
23. CMS. CMS Framework for Health Equity 2022–2032. 2022; <https://www.cms.gov/files/document/cms-framework-health-equity.pdf>.
24. McClellan J, King M-C. Genetic Heterogeneity in Human Disease. *Cell*. 141(2):210-217.
25. Waldman SA, Terzic A. Therapeutic targeting: a crucible for individualized medicine. *Clinical Pharmacology & Therapeutics*. 2008;83(5):651–654.
26. Rouzier R, Perou CM, Symmans WF, et al. Breast cancer molecular subtypes respond differently to preoperative chemotherapy. *Clinical cancer research: an official journal of the American Association for Cancer Research*. 2005;11(16):5678-5685.

- 776 27. Sorlie T, Perou CM, Tibshirani R, et al. Gene expression patterns of breast carcinomas distinguish tumor  
777 subclasses with clinical implications. *Proceedings of the National Academy of Sciences of the United States*  
778 *of America*. 2001;98(19):10869-10874.
- 779 28. Fitzpatrick AM, Teague WG, Meyers DA, et al. Heterogeneity of severe asthma in childhood: confirmation by  
780 cluster analysis of children in the National Institutes of Health/National Heart, Lung, and Blood Institute  
781 Severe Asthma Research Program. *The Journal of allergy and clinical immunology*. 2011;127(2):382-  
782 389.e381-313.
- 783 29. Haldar P, Pavord ID, Shaw DE, et al. Cluster analysis and clinical asthma phenotypes. *American journal of*  
784 *respiratory and critical care medicine*. 2008;178(3):218-224.
- 785 30. Lotvall J, Akdis CA, Bacharier LB, et al. Asthma endotypes: a new approach to classification of disease  
786 entities within the asthma syndrome. *The Journal of allergy and clinical immunology*. 2011;127(2):355-360.
- 787 31. Nair P, Pizzichini MMM, Kjarsgaard M, et al. Mepolizumab for Prednisone-Dependent Asthma with Sputum  
788 Eosinophilia. *New England Journal of Medicine*. 2009;360(10):985-993.
- 789 32. Ortega HG, Liu MC, Pavord ID, et al. Mepolizumab Treatment in Patients with Severe Eosinophilic Asthma.  
790 *New England Journal of Medicine*. 2014;371(13):1198-1207.
- 791 33. Collins FS, Varmus H. A new initiative on precision medicine. *The New England journal of medicine*.  
792 2015;372(9):793-795.
- 793 34. Lacy ME, Wellenius GA, Carnethon MR, et al. Racial Differences in the Performance of Existing Risk  
794 Prediction Models for Incident Type 2 Diabetes: The CARDIA Study. *Diabetes care*. 2015.
- 795 35. Baker JJ. Medicare payment system for hospital inpatients: diagnosis-related groups. *Journal of health care*  
796 *finance*. 2002;28(3):1-13.
- 797 36. Lipkovich I, Dmitrienko A, Denne J, Enas G. Subgroup identification based on differential effect search--a  
798 recursive partitioning method for establishing response to treatment in patient subpopulations. *Statistics in*  
799 *medicine*. 2011;30(21):2601-2621.
- 800 37. Kehl V, Ulm K. Responder identification in clinical trials with censored data. *Comput Stat Data Anal*.  
801 2006;50(5):1338-1355.
- 802 38. Hastie T, Tibshirani R, Friedman J. *The Elements of Statistical Learning*. New York, NY, USA: Springer New  
803 York Inc.; 2001.
- 804 39. Abu-jamous B, Fa R, Nandi AK. *Integrative Cluster Analysis in Bioinformatics*. Chichester, West Sussex,  
805 United Kingdom: John Wiley & Sons, Ltd.; 2015.
- 806 40. Lochner KA, Cox CS. Prevalence of multiple chronic conditions among Medicare beneficiaries, United States,  
807 2010. *Preventing chronic disease*. 2013;10:E61.
- 808 41. Aryal S, Diaz-Guzman E, Mannino DM. Prevalence of COPD and comorbidity. *European Respiratory*  
809 *Monograph*. 2013;59:1-12.
- 810 42. Baty F, Putora PM, Isenring B, Blum T, Brutsche M. Comorbidities and burden of COPD: a population based  
811 case-control study. *PloS one*. 2013;8(5):e63285.
- 812 43. Moni MA, Lio P. Network-based analysis of comorbidities risk during an infection: SARS and HIV case studies.  
813 *BMC bioinformatics*. 2014;15:333.
- 814 44. Cramer AO, Waldorp LJ, van der Maas HL, Borsboom D. Comorbidity: a network perspective. *The Behavioral*  
815 *and brain sciences*. 2010;33(2-3):137-150; discussion 150-193.
- 816 45. Islam MM, Valderas JM, Yen L, Dawda P, Jowsey T, McRae IS. Multimorbidity and comorbidity of chronic  
817 diseases among the senior Australians: prevalence and patterns. *PloS one*. 2014;9(1):e83783.
- 818 46. Folino F, Pizzuti C, Ventura M. A comorbidity network approach to predict disease risk. Proceedings of the  
819 First international conference on Information technology in bio- and medical informatics; 2010; Bilbao, Spain.
- 820 47. Newman MEJ. *Networks: An Introduction*. Oxford, United Kingdom: Oxford University Press; 2010.
- 821 48. Treviño S, Nyberg A, Del Genio CI, Bassler KE. Fast and accurate determination of modularity and its effect  
822 size. *Journal of Statistical Mechanics: Theory and Experiment*. 2015;2015(2):P02003.
- 823 49. Chauhan R, Ravi J, Datta P, et al. Reconstruction and topological characterization of the sigma factor  
824 regulatory network of Mycobacterium tuberculosis. *Nature communications*. 2016;7:11062.
- 825 50. Bhavnani SK, Dang B, Penton R, et al. How High-Risk Comorbidities Co-Occur in Readmitted Patients With  
826 Hip Fracture: Big Data Visual Analytical Approach. *JMIR Med Inform*. 2020;8(10):e13567.
- 827 51. Fruchterman T, Reingold E. Graph Drawing by Force-Directed Placement. *Software – Practice & Experience*.  
828 1991;21(11):1129–1164.
- 829 52. Dang B, Chen T, Bassler KE, Bhavnani SK. ExplodeLayout: Enhancing the Comprehension of Large and  
830 Dense Networks. *AMIA Jt Summits Transl Sci Proc*. ; 2016.

- 831 53. Bhavnani SK, Chen T, Ayyaswamy A, et al. Enabling Comprehension of Patient Subgroups and  
832 Characteristics in Large Bipartite Networks: Implications for Precision Medicine. *Proceedings of AMIA Joint*  
833 *Summits on Translational Science*. 2017:21-29.
- 834 54. Bhavnani SK, Eichinger F, Martini S, Saxman P, Jagadish HV, Kretzler M. Network analysis of genes  
835 regulated in renal diseases: implications for a molecular-based classification. *BMC bioinformatics*. 2009;10  
836 Suppl 9:S3.
- 837 55. Bhavnani SK, Bellala G, Ganesan A, et al. The nested structure of cancer symptoms. Implications for  
838 analyzing co-occurrence and managing symptoms. *Methods of information in medicine*. 2010;49(6):581-591.
- 839 56. Bhavnani SK, Ganesan A, Hall T, et al. Discovering hidden relationships between renal diseases and  
840 regulated genes through 3D network visualizations. *BMC research notes*. 2010;3:296.
- 841 57. Bhavnani SK, Victor S, Calhoun WJ, et al. How cytokines co-occur across asthma patients: from bipartite  
842 network analysis to a molecular-based classification. *Journal of biomedical informatics*. 2011;44 Suppl  
843 1:S24-30.
- 844 58. Bhavnani SK, Bellala G, Victor S, Bassler KE, Visweswaran S. The role of complementary bipartite visual  
845 analytical representations in the analysis of SNPs: a case study in ancestral informative markers. *Journal of*  
846 *the American Medical Informatics Association: JAMIA*. 2012;19(e1):e5-e12.
- 847 59. Bhavnani SK, Dang B, Bellala G, et al. Unlocking proteomic heterogeneity in complex diseases through  
848 visual analytics. *Proteomics*. 2015;15(8):1405-1418.
- 849 60. Bhavnani SK, Dang B, Kilaru V, et al. Methylation differences reveal heterogeneity in preterm  
850 pathophysiology: results from bipartite network analyses. *Journal of perinatal medicine*. 2018;46(5):509-521.
- 851 61. Bhavnani SK, Kummerfeld E, Zhang W, et al. Heterogeneity in COVID-19 Patients at Multiple Levels of  
852 Granularity: From Biclusters to Clinical Interventions. *Proceedings of the American Medical Informatics*  
853 *Association Summits*. 2021:112-121.
- 854 62. Shneiderman B. Human-centered AI: ensuring human control while increasing automation. Proceedings of  
855 the 5th Workshop on Human Factors in Hypertext; 2022; Barcelona, Spain.
- 856 63. Chen Y, Clayton EW, Novak LL, Anders S, Malin B. Human-Centered Design to Address Biases in Artificial  
857 Intelligence. *Journal of medical Internet research*. 2023;25:e43251.
- 858 64. Shneiderman B. Human-Centered Artificial Intelligence: Reliable, Safe & Trustworthy. *International Journal*  
859 *of Human-Computer Interaction*. 2020;36:495 - 504.
- 860 65. Patel SB, Nguyen NT. Creation of a Mapped, Machine-Readable Taxonomy to Facilitate Extraction of Social  
861 Determinants of Health Data from Electronic Health Records. *Proceedings of AMIA Annual Symposium*.  
862 2021;2021:959-968.
- 863 66. Allen J, Balfour R, Bell R, Marmot M. Social determinants of mental health. *International Review of Psychiatry*.  
864 2014;26(4):392-407.
- 865 67. Busse D, Yim IS, Campos B, Marshburn CK. Discrimination and the HPA axis: current evidence and future  
866 directions. *Journal of behavioral medicine*. 2017;40(4):539-552.
- 867 68. Decker A, Weaver R. Health and Social Determinants Associated With Delay of Health Care Among Rural  
868 Older Adults. *Innovation in Aging*. 2021;5(Supplement\_1):210-211.
- 869 69. Newton MF, Keirns CC, Cunningham R, Hayward RA, Stanley R. Uninsured adults presenting to US  
870 emergency departments: assumptions vs data. *Jama*. 2008;300(16):1914-1924.
- 871 70. Bhavnani SK, Zhang W, Visweswaran S, Raji M, Kuo YF. A Framework for Modeling and Interpreting Patient  
872 Subgroups Applied to Hospital Readmission: Visual Analytical Approach. *JMIR Med Inform*.  
873 2022;10(12):e37239.
- 874 71. van der Wal WM, Geskus RB. ipw: An R Package for Inverse Probability Weighting. *Journal of Statistical*  
875 *Software*. 2011;43(13):1 - 23.
- 876 72. Thoemmes F, Ong AD. A Primer on Inverse Probability of Treatment Weighting and Marginal Structural  
877 Models. *Emerging Adulthood*. 2016;4(1):40-59.
- 878 73. Lee YH, Liu Z, Fatori D, et al. Association of Everyday Discrimination With Depressive Symptoms and  
879 Suicidal Ideation During the COVID-19 Pandemic in the All of Us Research Program. *JAMA psychiatry*.  
880 2022;79(9):898-906.
- 881 74. Chen T, Zhang W, Bhavnani S. BipartiteModularityMaximization: CRAN R Package. 2022; [https://cran.r-](https://cran.r-project.org/web/packages/BipartiteModularityMaximization/index.html)  
882 [project.org/web/packages/BipartiteModularityMaximization/index.html](https://cran.r-project.org/web/packages/BipartiteModularityMaximization/index.html), 2023.
- 883 75. Bhavnani SK, Zhang W. ExplodeLayout: CRAN R Package. 2022; [https://cran.r-](https://cran.r-project.org/web/packages/ExplodeLayout/index.html)  
884 [project.org/web/packages/ExplodeLayout/index.html](https://cran.r-project.org/web/packages/ExplodeLayout/index.html), 2023.

- 885 76. DataScienceMeta. CRAN R Packages by Number of Downloads.  
886 <http://www.datasciencemeta.com/rpackages>, 2023.
- 887 77. Bhavnani S, Zhang W, Bao D, et al. The Impact of Critical Social Determinants of Health on Personal Medical  
888 Decisions: Analysis of Older Americans in All of Us. *Journal of Clinical and Translational Science*. In press.
- 889 78. Bhavnani S, Zhang W, Bao D, Hatch S, Reistetter T, Downer B. Generalizable Machine Learning Methods  
890 for Subtyping Individuals on National Health Databases: Case Studies Using Data from HRS, N3C, and All  
891 of Us. *Journal of Clinical and Translational Science*. In Press.
- 892 79. Dhillon IS, Sra S. Generalized nonnegative matrix approximations with Bregman divergences. Proceedings  
893 of the 18th International Conference on Neural Information Processing Systems; 2005; Vancouver, British  
894 Columbia, Canada.
- 895 80. Dilsizian ME, Siegel EL. Machine Meets Biology: a Primer on Artificial Intelligence in Cardiology and Cardiac  
896 Imaging. *Current cardiology reports*. 2018;20(12):139.
- 897 81. Bhavnani SK, Visweswaran S, Divekar R, Brasier AR. Towards Team-Centered Informatics: Accelerating  
898 Innovation in Multidisciplinary Scientific Teams Through Visual Analytics. *The Journal of Applied Behavioral  
899 Science*. 2018:0021886318794606.
- 900 82. Wooten KC, Calhoun WJ, Bhavnani S, Rose RM, Ameredes B, Brasier AR. Evolution of Multidisciplinary  
901 Translational Teams (MTTs): Insights for Accelerating Translational Innovations. *Clinical and translational  
902 science*. 2015;8(5):542-552.

903

904

905 **Appendix A: Description of Bipartite Network Analysis** A network consists of nodes and edges; nodes represent

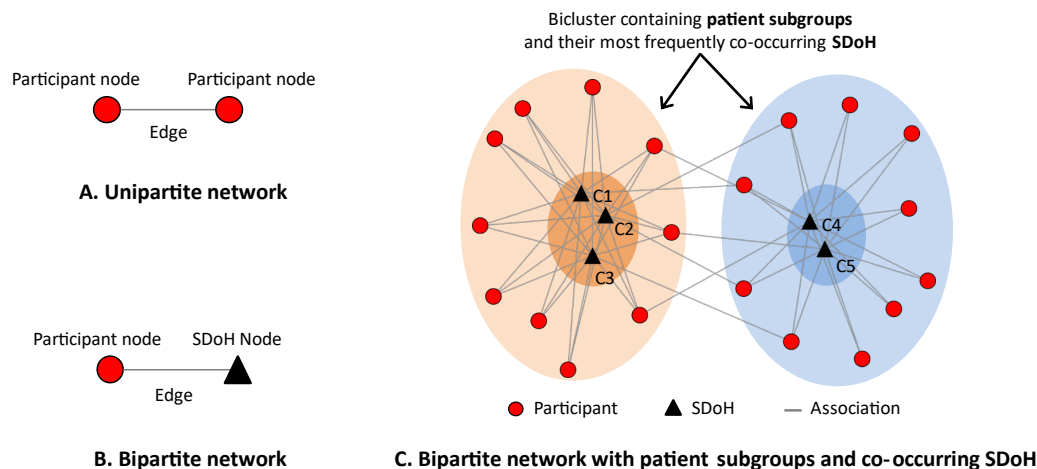

**Fig. 1.** The distinction between a unipartite network (A), a bipartite network (B), and how the latter can be used to identify biclusters of participants and their most frequently co-occurring SDoH (C).

906 one or more types of entities (e.g., participants or SDoH), and edges between the nodes represent a specific  
907 relationship between the entities. Figure 1A shows a unipartite network where nodes are the same type (typically  
908 used to analyze co-occurrence of comorbidities<sup>46</sup>). In contrast, Figure 1B shows a bipartite network where nodes  
909 are of two types, and edges exist only between different types such as between participants (circles) and SDoH  
910 (triangles). Bipartite network analysis takes as input any dataset such as *All of Us* participants and their SDoH,  
911 and automatically outputs a quantitative and visual description of biclusters (containing both participant  
912 subgroups, and their frequently co-occurring SDoH). The quantitative output provides the number, size, and  
913 statistical significance of the biclusters,<sup>48-50</sup> and the visual output displays the quantitative information of the  
914 biclusters through a network visualization.<sup>51-53</sup> Bipartite network analysis therefore enables (1) the automatic  
915 identification of biclusters and their significance, and (2) the visualization of the biclusters critical for their clinical  
916 interpretability including labeling the subtypes, inferring potential mechanisms that precipitate adverse outcomes  
917 in each subtype, and designing targeted interventions to prevent them. Furthermore, the characteristics (e.g.,  
918 outcomes and covariates) of participants in a subtype can be used to measure the risk of a subtype for an  
919 adverse outcome when compared to a reference group (e.g., a control group or another subtype), and therefore  
920 enables the integration of multiple data types. Finally, the biclusters can be used to develop classifiers for  
921 classifying a new participant into one or more of the subtypes, and developing a predictive model that uses those  
922 subtype membership for measuring the risk of an adverse outcome for that new participant.<sup>70</sup>

923  
924

**Appendix B: SNOMED Codes Related to SDoH, and their Use in the Electronic Health Records of Participants in All of Us.**

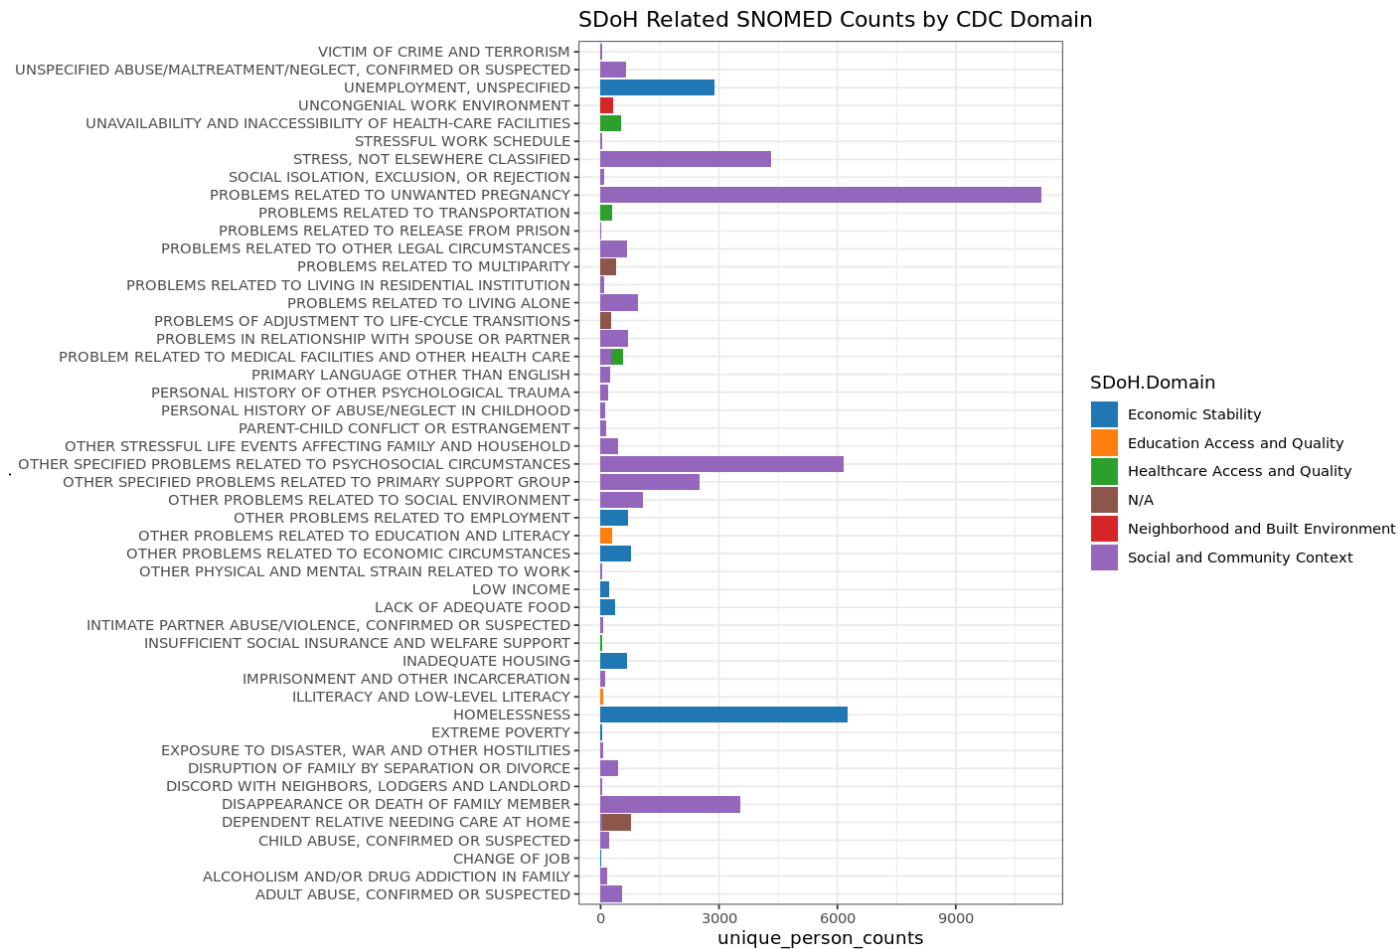

925

926  
927  
928  
929

**Appendix C: Four All of Us surveys (Column-2), contained 110 SDOH questions (Column-3), that were abbreviated, negatively phrased (shown bolded) and reversed coded (shown in red) (Column-3), categorized into the five HP-30 domains (Column-4 and shown by the five colors), and further categorized (boxes) by the expert panel into 18 factors (Column-5; *Delayed Medical Care* was used as an outcome).**

| No. | All of Us Survey Name              | Question/Field                                                                                                                                                | Abbreviated; & Negatively Phrased (Bolded)            | 5 SDOH Domains (HP-30)           | 18 SDOH Factors                                |
|-----|------------------------------------|---------------------------------------------------------------------------------------------------------------------------------------------------------------|-------------------------------------------------------|----------------------------------|------------------------------------------------|
| 1   | Social Determinants of Health      | People around here are willing to help their neighbors                                                                                                        | Neighborhood people unwilling to help                 | Social & community context       | Poor Neighborhood Cohesion                     |
| 2   | Social Determinants of Health      | People in my neighborhood generally get along with each other                                                                                                 | Neighborhood people do not get along                  | Social & community context       | Poor Neighborhood Cohesion                     |
| 3   | Social Determinants of Health      | People in my neighborhood can be trusted                                                                                                                      | Neighborhood people cannot be trusted                 | Social & community context       | Poor Neighborhood Cohesion                     |
| 4   | Social Determinants of Health      | People in my neighborhood share the same values                                                                                                               | Neighborhood people do not share values               | Social & community context       | Poor Neighborhood Cohesion                     |
| 5   | Social Determinants of Health      | I'm always having trouble with my neighbors                                                                                                                   | Neighborhood people troublesome                       | Social & community context       | Poor Neighborhood Cohesion                     |
| 6   | Social Determinants of Health      | In my neighborhood, people watch out for each other                                                                                                           | Neighborhood people do not watch out for another      | Social & community context       | Poor Neighborhood Cohesion                     |
| 7   | Social Determinants of Health      | Someone to help you if you were confined to bed                                                                                                               | No one to help out of bed                             | Social & community context       | Low Supportive Relationships                   |
| 8   | Social Determinants of Health      | Someone to take you to the doctor if you need it                                                                                                              | No help for doctor visit                              | Social & community context       | Low Supportive Relationships                   |
| 9   | Social Determinants of Health      | Someone to prepare your meals if you were unable to do it yourself                                                                                            | No one help with meal prep                            | Social & community context       | Low Supportive Relationships                   |
| 10  | Social Determinants of Health      | Someone to help with daily chores if you were sick                                                                                                            | No help when sick                                     | Social & community context       | Low Supportive Relationships                   |
| 11  | Social Determinants of Health      | Someone to have a good time with                                                                                                                              | No one to have good time with                         | Social & community context       | Low Supportive Relationships                   |
| 12  | Social Determinants of Health      | Someone to turn to for suggestions about how to deal with a personal problem                                                                                  | No one to suggest problem solutions                   | Social & community context       | Low Supportive Relationships                   |
| 13  | Social Determinants of Health      | Someone who understands your problems                                                                                                                         | No one who understands problems                       | Social & community context       | Low Supportive Relationships                   |
| 14  | Overall Health                     | How often do you have someone help you read health-related materials?                                                                                         | No one to help read health materials                  | Social & community context       | Low Supportive Relationships                   |
| 15  | Social Determinants of Health      | Someone to love and make you feel wanted                                                                                                                      | No one to make you feel wanted                        | Social & community context       | Low Supportive Relationships                   |
| 16  | Social Determinants of Health      | I lack companionship                                                                                                                                          | Lack companionship frequency                          | Social & community context       | Poor Relationships with Others                 |
| 17  | Social Determinants of Health      | There is no one I can turn to                                                                                                                                 | No one to turn to frequency                           | Social & community context       | Poor Relationships with Others                 |
| 18  | Social Determinants of Health      | You are treated with less courtesy than other people are                                                                                                      | Day to day less courtesy frequency                    | Social & community context       | Discriminatory Experiences in Everyday Life    |
| 19  | Social Determinants of Health      | You are treated with less respect than other people are                                                                                                       | Day to day less respect frequency                     | Social & community context       | Discriminatory Experiences in Everyday Life    |
| 20  | Social Determinants of Health      | You receive poorer service than other people at restaurants or stores                                                                                         | Day to day poorer service frequency                   | Social & community context       | Discriminatory Experiences in Everyday Life    |
| 21  | Social Determinants of Health      | People act as if they think you are not smart                                                                                                                 | Others think you as less smart                        | Social & community context       | Discriminatory Experiences in Everyday Life    |
| 22  | Social Determinants of Health      | People act as if they are afraid of you                                                                                                                       | Others are afraid of you                              | Social & community context       | Discriminatory Experiences in Everyday Life    |
| 23  | Social Determinants of Health      | People act as if they think you are dishonest                                                                                                                 | Others think you are dishonest                        | Social & community context       | Discriminatory Experiences in Everyday Life    |
| 24  | Social Determinants of Health      | People act as if they're better than you are                                                                                                                  | Others think they're better than you                  | Social & community context       | Discriminatory Experiences in Everyday Life    |
| 25  | Social Determinants of Health      | You are called names or insulted                                                                                                                              | Called names or insulted frequency                    | Social & community context       | Discriminatory Experiences in Everyday Life    |
| 26  | Social Determinants of Health      | You are threatened or harassed                                                                                                                                | Threatened or harassed frequency                      | Social & community context       | Discriminatory Experiences in Everyday Life    |
| 27  | Social Determinants of Health      | Do you speak a language other than English at home?                                                                                                           | Not bilingual                                         | Social & community context       | Language Barrier                               |
| 28  | Social Determinants of Health      | Since you speak a language other than English at home, how well would you say you speak it?                                                                   | English verbal proficiency                            | Social & community context       | Language Barrier                               |
| 29  | The Basics                         | In what country were you born?                                                                                                                                | US born                                               | Social & community context       | Disadvantaged Demographics                     |
| 30  | The Basics                         | Which categories describe you? Select all that apply. Note, you may select more than one.                                                                     | Non-white race                                        | Social & community context       | Disadvantaged Demographics                     |
| 31  | The Basics                         | What was your biological sex assigned at birth?                                                                                                               | Nonbinary sex                                         | Social & community context       | Disadvantaged Demographics                     |
| 32  | The Basics                         | What terms best express how you describe your gender identity (check all that apply)?                                                                         | Nonbinary gender identity                             | Social & community context       | Disadvantaged Demographics                     |
| 33  | The Basics                         | Which of the following best represents how you think of yourself?                                                                                             | Non-heterosexual                                      | Social & community context       | Disadvantaged Demographics                     |
| 34  | The Basics                         | What is your current marital status?                                                                                                                          | Unmarried                                             | Social & community context       | Disadvantaged Demographics                     |
| 35  | The Basics                         | Not including yourself, how many other people live at home with you?                                                                                          | Single Household                                      | Social & community context       | Disadvantaged Demographics                     |
| 36  | The Basics                         | Think of other people who live with you. How many are under the age of 18 years?                                                                              | Housing dependents                                    | Social & community context       | Disadvantaged Demographics                     |
| 37  | The Basics                         | Have you ever served on active duty in the United States Armed Forces?                                                                                        | Active duty status                                    | Social & community context       | Disadvantaged Demographics                     |
| 38  | Social Determinants of Health      | There is a lot of graffiti in my neighborhood                                                                                                                 | Neighborhood has a lot of graffiti                    | Neighborhood & built environment | Disadvantaged Neighborhood Characteristics     |
| 39  | Social Determinants of Health      | My neighborhood is noisy                                                                                                                                      | Neighborhood is noisy                                 | Neighborhood & built environment | Disadvantaged Neighborhood Characteristics     |
| 40  | Social Determinants of Health      | Vandalism is common in my neighborhood                                                                                                                        | Neighborhood vandalism is common                      | Neighborhood & built environment | Disadvantaged Neighborhood Characteristics     |
| 41  | Social Determinants of Health      | There are a lot of abandoned buildings in my neighborhood                                                                                                     | Neighborhood has many abandoned buildings             | Neighborhood & built environment | Disadvantaged Neighborhood Characteristics     |
| 42  | Social Determinants of Health      | My neighborhood is clean                                                                                                                                      | Neighborhood not clean                                | Neighborhood & built environment | Disadvantaged Neighborhood Characteristics     |
| 43  | Social Determinants of Health      | People in my neighborhood take good care of their houses and apartments                                                                                       | Neighborhood is not well maintained                   | Neighborhood & built environment | Disadvantaged Neighborhood Characteristics     |
| 44  | Social Determinants of Health      | There are too many people hanging around on the streets near my home                                                                                          | Neighborhood has too many loiterers                   | Neighborhood & built environment | Disadvantaged Neighborhood Characteristics     |
| 45  | Social Determinants of Health      | There is a lot of crime in my neighborhood                                                                                                                    | Neighborhood has a lot of crime                       | Neighborhood & built environment | Disadvantaged Neighborhood Characteristics     |
| 46  | Social Determinants of Health      | There is too much drug use in my neighborhood                                                                                                                 | Neighborhood has too much drug use                    | Neighborhood & built environment | Disadvantaged Neighborhood Characteristics     |
| 47  | Social Determinants of Health      | There is too much alcohol use in my neighborhood                                                                                                              | Neighborhood has too much alcohol                     | Neighborhood & built environment | Disadvantaged Neighborhood Characteristics     |
| 48  | Social Determinants of Health      | My neighborhood is safe                                                                                                                                       | Neighborhood is not safe                              | Neighborhood & built environment | Disadvantaged Neighborhood Characteristics     |
| 49  | Social Determinants of Health      | What is the main type of housing in your neighborhood?                                                                                                        | Neighborhood mostly apartments                        | Neighborhood & built environment | Disadvantaged Neighborhood Characteristics     |
| 50  | Social Determinants of Health      | Many shops, stores, markets or other places to buy things I need are within easy walking distance                                                             | No shopping resource in walking proximity             | Neighborhood & built environment | Disadvantaged Neighborhood Characteristics     |
| 51  | Social Determinants of Health      | It is within a 10-15 minutes walk to a transit stop from home                                                                                                 | No transportation in walking proximity                | Neighborhood & built environment | Disadvantaged Neighborhood Characteristics     |
| 52  | Social Determinants of Health      | There are sidewalks on most of the streets in my neighborhood                                                                                                 | Neighborhood has no sidewalks                         | Neighborhood & built environment | Disadvantaged Neighborhood Characteristics     |
| 53  | Social Determinants of Health      | There are facilities to bicycle in or near my neighborhood (e.g., special lanes, trails, paths)                                                               | Neighborhood is not bike friendly                     | Neighborhood & built environment | Disadvantaged Neighborhood Characteristics     |
| 54  | Social Determinants of Health      | My neighborhood has several free or low-cost recreation facilities (e.g., parks, pools, playgrounds)                                                          | Neighborhood has no recreation spaces                 | Neighborhood & built environment | Disadvantaged Neighborhood Characteristics     |
| 55  | Social Determinants of Health      | The crime rate in my neighborhood makes it unsafe to go on walks at night                                                                                     | Neighborhood is unsafe at night                       | Neighborhood & built environment | Disadvantaged Neighborhood Characteristics     |
| 56  | Social Determinants of Health      | The crime rate in my neighborhood makes it unsafe to go on walks during the day                                                                               | Neighborhood is unsafe in the day                     | Neighborhood & built environment | Disadvantaged Neighborhood Characteristics     |
| 57  | Social Determinants of Health      | Think about the place you live. Do you have problems with any of the following (check all that apply)?                                                        | Home has problems                                     | Neighborhood & built environment | Disadvantaged Neighborhood Characteristics     |
| 58  | Social Determinants of Health      | Within the past 12 months, we worried whether our food would run out before we went shopping                                                                  | Food insecurity                                       | Economic stability               | Food Insecurity                                |
| 59  | Social Determinants of Health      | Within the past 12 months, the food we bought just didn't last and we didn't have money to buy more                                                           | Food inadequate and insecure                          | Economic stability               | Food Insecurity                                |
| 60  | Social Determinants of Health      | In the last 12 months, how many times have you or your family moved from one home to another?                                                                 | Moved home                                            | Economic stability               | Housing Insecurity                             |
| 61  | The Basics                         | Do you own or rent the place where you live?                                                                                                                  | Lack of Home Ownership/Rent                           | Economic stability               | Housing Insecurity                             |
| 62  | The Basics                         | Where are you currently living?                                                                                                                               | Current Living Situation                              | Economic stability               | Housing Insecurity                             |
| 63  | The Basics                         | How many years have you lived at your current address?                                                                                                        | Lived Less than 1 Year                                | Economic stability               | Housing Insecurity                             |
| 64  | The Basics                         | In the past 6 months, have you been worried or concerned about NOT having a place to live?                                                                    | Unstable Housing                                      | Economic stability               | Housing Insecurity                             |
| 65  | The Basics                         | What is your current employment status? Please select 1 or more of these categories.                                                                          | Unemployed                                            | Economic stability               | Not Employed                                   |
| 66  | The Basics                         | What is your annual household income from all sources?                                                                                                        | Poverty Income                                        | Economic stability               | Low Income                                     |
| 67  | Overall Health                     | How often do you have problems learning about your medical condition because of difficulty reading?                                                           | Health literacy                                       | Education access and quality     | Low Literacy                                   |
| 68  | The Basics                         | What is the highest grade or year of school you completed?                                                                                                    | Lack college education                                | Education access and quality     | Low Educational Attainment                     |
| 69  | Health Care Access and Utilization | During the past 12 months, were you told by a health care provider or doctor's office to get a health insurance card?                                         | Health insurance not accepted                         | Health care access and quality   | Lack of Health Coverage                        |
| 70  | Health Care Access and Utilization | In regard to your health insurance card coverage, how does it compare to a year ago?                                                                          | Health insurance coverage worse                       | Health care access and quality   | Lack of Health Coverage                        |
| 71  | Health Care Access and Utilization | Is there a place that you USUALLY go to when you are sick or need advice about your health?                                                                   | No place for health advice                            | Health care access and quality   | Lack of Health Coverage                        |
| 72  | Health Care Access and Utilization | If yes, what kind of place do you go to most often?                                                                                                           | No kind of doctor place                               | Health care access and quality   | Lack of Health Coverage                        |
| 73  | Health Care Access and Utilization | About how long has it been since you last saw or talked to a doctor or other health care provider?                                                            | More than 1 year since last spoken to health provider | Health care access and quality   | Lack of Health Coverage                        |
| 74  | Health Care Access and Utilization | How often were you treated with respect by your doctors or health care providers?                                                                             | Healthcare discrimination less respect                | Health care access and quality   | Poor Interaction with Providers                |
| 75  | Health Care Access and Utilization | How often did your doctor or health care providers ask for your opinions or beliefs about your health?                                                        | Not asked for opinion by provider                     | Health care access and quality   | Poor Interaction with Providers                |
| 76  | Health Care Access and Utilization | How often did your doctors or health care providers tell or give you information about your health?                                                           | Advice not easy to understand                         | Health care access and quality   | Poor Interaction with Providers                |
| 77  | Health Care Access and Utilization | Have you delayed getting care in the past 12 months because you didn't have transportation?                                                                   | Delayed care d/t Transportation                       | Health care access and quality   | Used as an Outcome                             |
| 78  | Health Care Access and Utilization | Have you delayed getting care in the past 12 months because you live in a rural area with no nearby health care provider?                                     | Delayed care d/t rural area                           | Health care access and quality   | Used as an Outcome                             |
| 79  | Health Care Access and Utilization | Have you delayed getting care in the past 12 months because you were nervous about going to the doctor?                                                       | Delayed care d/t nervousness                          | Health care access and quality   | Used as an Outcome                             |
| 80  | Health Care Access and Utilization | Have you delayed getting care in the past 12 months because you couldn't get time off work?                                                                   | Delayed care d/t work                                 | Health care access and quality   | Used as an Outcome                             |
| 81  | Health Care Access and Utilization | Have you delayed getting care in the past 12 months because you couldn't get child care?                                                                      | Delayed care d/t childcare                            | Health care access and quality   | Used as an Outcome                             |
| 82  | Health Care Access and Utilization | Have you delayed getting care in the past 12 months because you couldn't afford the cost of care?                                                             | Delayed care d/t copay                                | Health care access and quality   | Used as an Outcome                             |
| 83  | Health Care Access and Utilization | Have you delayed getting care in the past 12 months because you provide care to a family member?                                                              | Delayed care d/t elderly care                         | Health care access and quality   | Used as an Outcome                             |
| 84  | Health Care Access and Utilization | You had to pay out of pocket for some or all of the procedure?                                                                                                | Delayed care d/t out of pocket                        | Health care access and quality   | Used as an Outcome                             |
| 85  | Health Care Access and Utilization | Have you delayed getting care in the past 12 months because your deduction was too small?                                                                     | Delayed care d/t deductible                           | Health care access and quality   | Used as an Outcome                             |
| 86  | Health Care Access and Utilization | During the past 12 months, was there any time when you needed prescription medicines but couldn't afford them?                                                | Can't afford Rx                                       | Health care access and quality   | Difficulty Affording Medical Care              |
| 87  | Health Care Access and Utilization | During the past 12 months, was there any time when you needed mental health care but couldn't afford it?                                                      | Can't afford mental health                            | Health care access and quality   | Difficulty Affording Medical Care              |
| 88  | Health Care Access and Utilization | During the past 12 months, was there any time when you needed emergency care but couldn't afford it?                                                          | Can't afford emergency care                           | Health care access and quality   | Difficulty Affording Medical Care              |
| 89  | Health Care Access and Utilization | During the past 12 months, was there any time when you needed dental care but couldn't afford it?                                                             | Can't afford dental care                              | Health care access and quality   | Difficulty Affording Medical Care              |
| 90  | Health Care Access and Utilization | During the past 12 months, was there any time when you needed eyeglasses but didn't have them?                                                                | Can't afford eyeglasses                               | Health care access and quality   | Difficulty Affording Medical Care              |
| 91  | Health Care Access and Utilization | During the past 12 months, was there any time when you needed to see a regular doctor but couldn't afford it?                                                 | Can't afford healthcare provider                      | Health care access and quality   | Difficulty Affording Medical Care              |
| 92  | Health Care Access and Utilization | During the past 12 months, was there any time when you needed to see a specialist but couldn't afford it?                                                     | Can't afford specialist                               | Health care access and quality   | Difficulty Affording Medical Care              |
| 93  | Health Care Access and Utilization | During the past 12 months, was there any time when you needed follow-up care but didn't have it?                                                              | Can't afford followup care                            | Health care access and quality   | Difficulty Affording Medical Care              |
| 94  | Health Care Access and Utilization | If you get sick or have an accident, how worried are you that you will be able to pay for care?                                                               | Worried about not paying for care                     | Health care access and quality   | Difficulty Affording Medical Care              |
| 95  | Health Care Access and Utilization | During the past 12 months, you skipped medication doses to save money?                                                                                        | Skipped meds to save money                            | Health care access and quality   | Difficulty Affording Medical Care              |
| 96  | Health Care Access and Utilization | During the past 12 months, you took less medicine to save money?                                                                                              | Took less meds to save money                          | Health care access and quality   | Difficulty Affording Medical Care              |
| 97  | Health Care Access and Utilization | During the past 12 months, you delayed filling a prescription to save money?                                                                                  | Delayed filling Rx to save money                      | Health care access and quality   | Difficulty Affording Medical Care              |
| 98  | Health Care Access and Utilization | During the past 12 months, you asked your doctor for a lower cost medication to save money?                                                                   | Lower cost Rx to save money                           | Health care access and quality   | Difficulty Affording Medical Care              |
| 99  | Health Care Access and Utilization | During the past 12 months, you bought prescription drugs from another country to save money?                                                                  | Bought Rx from another country to save money          | Health care access and quality   | Difficulty Affording Medical Care              |
| 100 | Health Care Access and Utilization | During the past 12 months, you used alternative therapies to save money?                                                                                      | Alternative therapy to save money                     | Health care access and quality   | Difficulty Affording Medical Care              |
| 101 | Health Care Access and Utilization | How important is it to you that your doctors or health care providers understand or are respectful of your race or ethnicity?                                 | Health provider race religion similar importance      | Health care access and quality   | Mismatched Provider Characteristics            |
| 102 | Health Care Access and Utilization | How often were you able to see doctors or health care providers who were similar to you?                                                                      | Health provider race religion dissimilar frequency    | Health care access and quality   | Mismatched Provider Characteristics            |
| 103 | Health Care Access and Utilization | How often have you either delayed or not gone to see doctors or health care providers because of your race or ethnicity?                                      | Health provider race religion delayed care            | Health care access and quality   | Mismatched Provider Characteristics            |
| 104 | Social Determinants of Health      | When you go to a doctor's office or other health care provider, how often are you treated with respect?                                                       | Healthcare discrimination less courtesy               | Health care access and quality   | Discriminatory Experiences in Medical Settings |
| 105 | Social Determinants of Health      | When you go to a doctor's office or other health care provider, how often are you treated with respect?                                                       | Healthcare discrimination less respect                | Health care access and quality   | Discriminatory Experiences in Medical Settings |
| 106 | Social Determinants of Health      | When you go to a doctor's office or other health care provider, how often do you receive poorer service than other people at restaurants or stores?           | Healthcare discrimination poorer service              | Health care access and quality   | Discriminatory Experiences in Medical Settings |
| 107 | Social Determinants of Health      | When you go to a doctor's office or other health care provider, how often does a doctor or other health care provider act as if they think you are not smart? | Healthcare discrimination intellect                   | Health care access and quality   | Discriminatory Experiences in Medical Settings |
| 108 | Social Determinants of Health      | When you go to a doctor's office or other health care provider, how does a doctor or other health care provider act as if they think you are dishonest?       | Healthcare discrimination fear                        | Health care access and quality   | Discriminatory Experiences in Medical Settings |
| 109 | Social Determinants of Health      | When you go to a doctor's office or other health care provider, how often does a doctor or other health care provider act as if they're better than you are?  | Healthcare discrimination inferiority                 | Health care access and quality   | Discriminatory Experiences in Medical Settings |
| 110 | Social Determinants of Health      | When you go to a doctor's office or other health care provider, how often do you feel discriminated against because of your race or ethnicity?                | Healthcare discrimination not listened to             | Health care access and quality   | Discriminatory Experiences in Medical Settings |

930



931 **Appendix D: Condition-specific cohort extraction for type II diabetes (T2DM), breast cancer, and coronary artery**

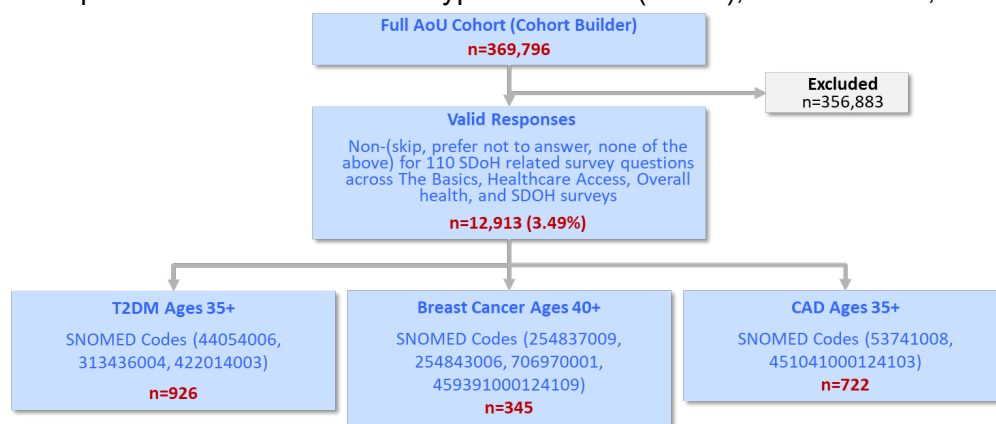

932 disease (CAD).

933 Inclusion and exclusion criteria for selecting three condition-specific cohorts.

**Figure 1.**

934 **Appendix E: Inverse Probability Weighting (IPW)**We found significant differences in the demographic  
935 proportions between our cohort (n=12,913) consisting of participants with valid answers for all 110 SDoH  
936 questions, and the total *All of Us* data. To adjust for potential sample selection bias, we calculated inverse  
937 probability weights (IPW) using the *ipwpoint* function in the R package *ipw*.<sup>66</sup> This function uses a logistic  
938 regression model to estimate the predicted probability of having valid responses on all SDoH variables based  
939 on age, sex, race, ethnicity, being born in the United States, currently employed, having a college degree or  
940 higher, health insurance, owning a home, and being married. We stabilized the weights according to the  
941 observed probability of being in our cohort. The resulting IPW weights were used as weights for the edges in the  
942 bipartite network.
